# Supplementary material for: A single precatalyst tandem RCM–allylic oxidation sequence
Source: Royal Society of Chemistry journal article supplement (doi:10.1039/c1cc11347j), 2011-01-01
Supplement: c1cc11347j.pdf [file c1cc11347j.pdf]

## Supplementary information

### A single precatalyst Tandem RCM-allylic oxidation sequence

*Bernd Schmidt\* and Stefan Krehl*

*Universitaet Potsdam, Institut fuer Chemie, Organische Synthesechemie, Karl-Liebknecht-*

*Strasse 24-25, D-14476 Golm, Germany*

bernd.schmidt@uni-potsdam.de

#### *Table of contents*

|    |                                                                                                                                  |     |
|----|----------------------------------------------------------------------------------------------------------------------------------|-----|
| A  | General remarks                                                                                                                  | S3  |
| B  | Synthesis and characterization data of Rauhut Carrier product <b>3</b>                                                           | S4  |
| C  | General experimental procedure for Tandem RCM-allylic oxidation                                                                  | S7  |
| D  | Specific details, analytical data and copies of spectra for coumarin <b>2</b>                                                    | S8  |
| D1 | 2 <i>H</i> -Chromen-2-one ( <b>2a</b> )                                                                                          | S8  |
| D2 | 6,8-Dibromo-2 <i>H</i> -chromen-2-one ( <b>2b</b> )                                                                              | S10 |
| D3 | 8-Methoxy-2 <i>H</i> -chromen-2-one ( <b>2c</b> ) and 2-( <i>tert</i> -butylperoxy)-8-methoxy-2 <i>H</i> -chromene ( <b>7c</b> ) | S12 |
| D4 | Synthesis of 8-methoxy-2 <i>H</i> -chromen-2-one ( <b>2c</b> ) with subsequent peroxide decomposition                            | S14 |

|     |                                                                                                                                |     |
|-----|--------------------------------------------------------------------------------------------------------------------------------|-----|
| D5  | 8-Ethoxy-2 <i>H</i> -chromen-2-one ( <b>2d</b> ) and 2-( <i>tert</i> -Butylperoxy)-8-ethoxy-2 <i>H</i> -chromene ( <b>7d</b> ) | S15 |
| D6  | Synthesis of 8-ethoxy-2 <i>H</i> -chromen-2-one ( <b>2d</b> ) with subsequent peroxide decomposition                           | S18 |
| D7  | 7-Methoxy-2 <i>H</i> -chromen-2-one ( <b>2e</b> )                                                                              | S19 |
| D8  | 6-Nitro-2 <i>H</i> -chromen-2-one ( <b>2f</b> )                                                                                | S21 |
| D9  | 6-Bromo-2 <i>H</i> -chromen-2-one ( <b>2g</b> )                                                                                | S23 |
| D10 | 6-Methyl-2 <i>H</i> -chromen-2-one ( <b>2h</b> )                                                                               | S25 |
| D11 | 6-Vinyl-2 <i>H</i> -chromen-2-one ( <b>2i</b> )                                                                                | S27 |
| D12 | 4-Methyl-2 <i>H</i> -chromen-2-one ( <b>2j</b> )                                                                               | S29 |
| D13 | 4,6-Dimethyl-2 <i>H</i> -chromen-2-one ( <b>2k</b> )                                                                           | S31 |
| D14 | 6-Bromo-4-methyl-2 <i>H</i> -chromen-2-one ( <b>2l</b> )                                                                       | S33 |
| D15 | 6-Chloro-4-methyl-2 <i>H</i> -chromen-2-one ( <b>2m</b> )                                                                      | S35 |
| D16 | 3 <i>H</i> -Benzo[ <i>f</i> ]chromen-3-one ( <b>2n</b> )                                                                       | S37 |
| D17 | Control experiment 1: allylic oxidation in the absence of Ru-catalyst                                                          | S39 |
| D18 | Control experiment 2: allylic oxidation of <b>5a</b> catalyzed by Ru-catalyst <b>A</b>                                         | S41 |

## A General Remarks

All experiments were conducted in dry reaction vessels under an atmosphere of dry nitrogen. Solvents were purified by standard procedures.  $^1\text{H}$  NMR spectra were obtained at 300 MHz in  $\text{CDCl}_3$  with Tetramethylsilane ( $\delta = 0.00$  ppm) as an internal standard. Coupling constants ( $J$ ) are given in Hz.  $^{13}\text{C}$  NMR spectra were recorded at 75 MHz in  $\text{CDCl}_3$  with  $\text{CDCl}_3$  ( $\delta = 77.0$  ppm) as an internal standard. The number of coupled protons was analyzed APT-experiments and is denoted by a number in parantheses following the chemical shift value. IR spectra were recorded in substance on NaCl or KBr plates. Wavenumbers ( $\nu$ ) are given in  $\text{cm}^{-1}$ . The peak intensities are defined as strong (s), medium (m) or weak (w). Mass spectra were obtained at 70 eV. The following starting materials were synthesized following literature procedures: **1a**,<sup>1</sup> **4a,c,e,f,g,m,n**,<sup>2</sup> **4j**,<sup>3</sup> **5a**.<sup>2</sup>

---

<sup>1</sup> L. Polito, M. Cravini, L. Poletti and L. Lay, *Synth. Commun.*, 2006, **36**, 2203-2209.

<sup>2</sup> S. Chang and R. H. Grubbs, *J. Org. Chem.*, 1998, **63**, 864-866.

<sup>3</sup> K.-S. Huang, S.-R. Li, Y.-F. Wang, Y.-L. Lin, Y.-H. Chen, T.-W. Tsai, C.-H. Yang and E.-C. Wang, *J. Chin. Chem. Soc.*, 2005, **52**, 159-167.

## B Synthesis and characterization data of Rauhut Currier product bis-(2-vinylphenyl)-2-methylenepentandioate (**3**)

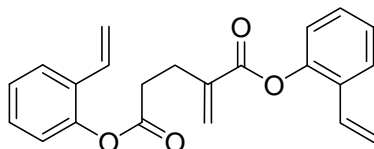

Acrylate **1a** (174 mg, 1.0 mmol) was dissolved in dry and degassed benzene (1.0 mL). Then the catalyst (**A**: 40 mg or PCy<sub>3</sub>: 14 mg, 0.05 mmol) was added and the reaction mixture was stirred for 19 h at 40 °C. The solvent was removed in vacuo and the residue was purified by column chromatography on silica. After purification, **3** was obtained as a colourless liquid (with catalyst **A**: 21 mg, 12%, with PCy<sub>3</sub>: 113 mg, 65%) <sup>1</sup>H-NMR: δ 7.58 (td, 2H, *J* = 7.6, 1.5), 7.34 – 7.17 (4H), 7.09 (dd, 1H, *J* = 7.8, 1.0), 7.03 (dd, 1H, *J* = 7.7, 0.9), 6.75 (dd, 1H, *J* = 17.6, 11.1), 6.75 (dd, 1H, *J* = 17.6, 11.1), 6.55 (s, 1H), 5.93 (s, 1H), 5.76 (d, 1H, *J* = 17.6), 5.75 (d, 1H, *J* = 17.6), 5.33 (d, 1H, *J* = 11.1), 5.31 (d, 1H, *J* = 11.1), 2.96 – 2.85 (4H); <sup>13</sup>C-NMR: δ 170.8 (0), 164.8 (0), 148.1 (0), 147.9 (0), 138.0 (0), 130.4 (1), 130.3 (1), 130.2 (0), 128.7 (1), 128.6 (1), 128.2 (2), 126.6 (1), 126.5 (1), 126.2 (1), 126.2 (1), 122.5 (1), 122.5 (1), 116.5 (2), 116.4 (2), 33.0 (2), 27.5 (2); IR (neat, cm<sup>-1</sup>):  $\tilde{\nu}$  = 2954 (m), 2922 (w), 2853 (m), 1760 (m), 1733 (m), 1630 (w), 1483 (w), 1452 (m); HRMS (EI): calcd for C<sub>22</sub>H<sub>20</sub>O<sub>4</sub> [M]<sup>+</sup>: 348.1356, found: 348.1378; MS (EI): *m/z* 348 (M<sup>+</sup>, 2), 230 (15), 229 (100), 201 (24), 187 (14), 120 (21), 109 (23), 91 (38); Anal. calcd for C<sub>22</sub>H<sub>20</sub>O<sub>4</sub>: C: 75.84, H: 5.79; found: C: 75.49, H: 5.22.

### $^1\text{H}$ NMR spectrum of 3

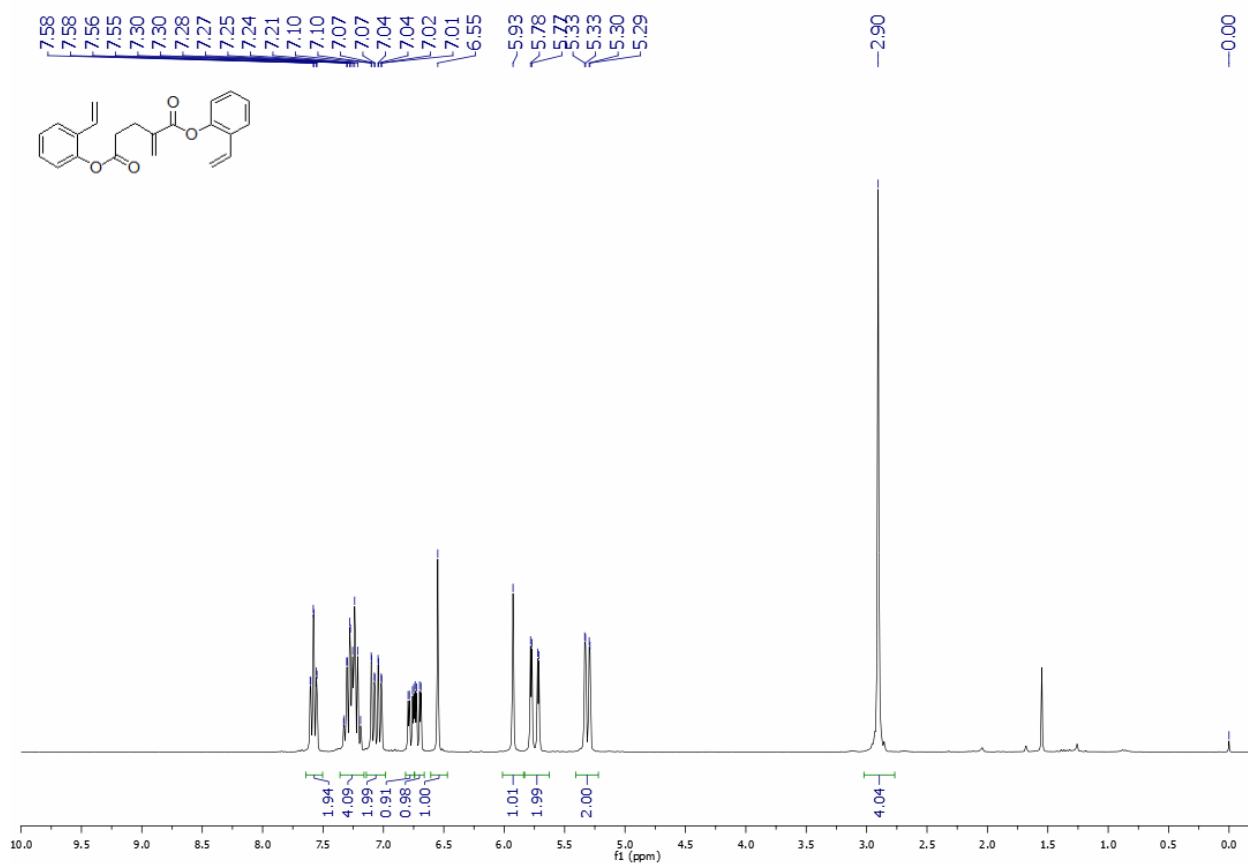

### $^{13}\text{C}$ NMR spectrum of 3

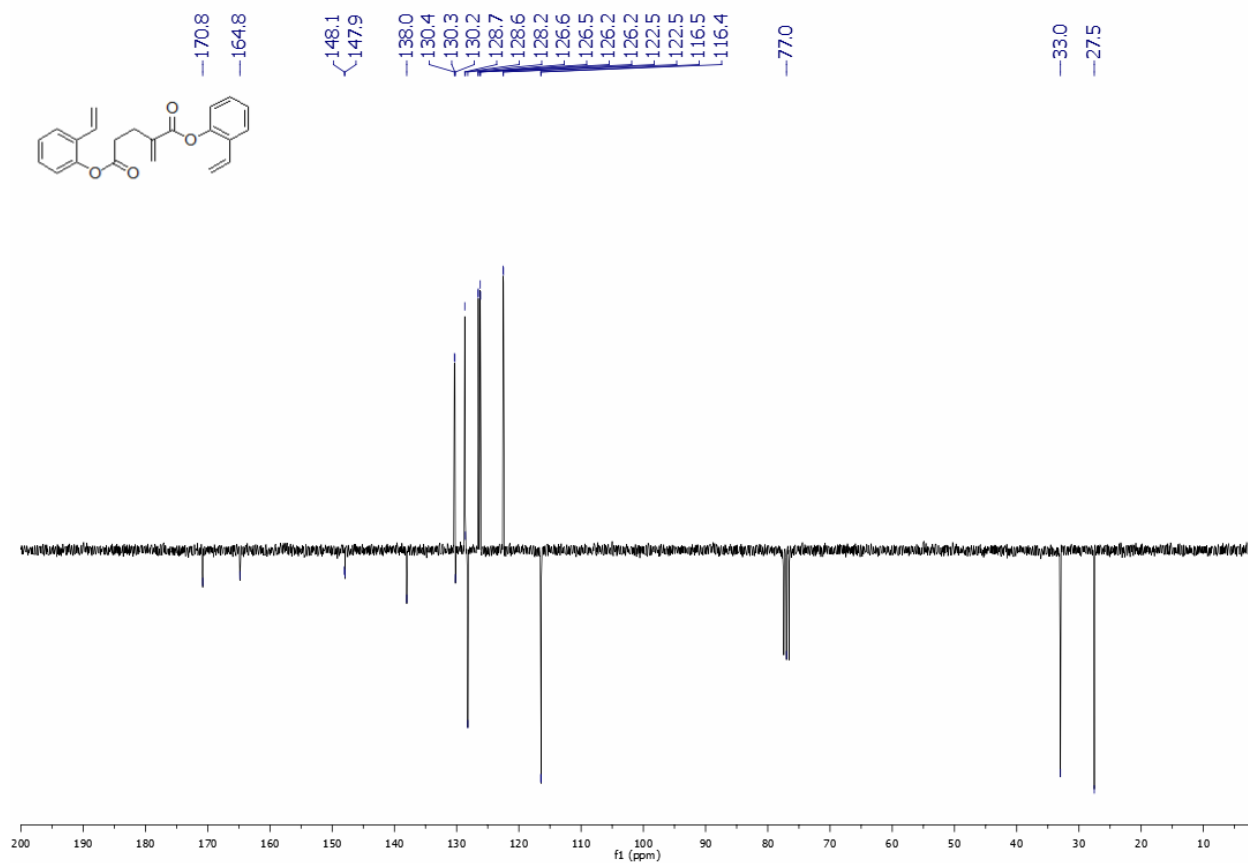

## **C General experimental procedures for Tandem RCM-allylic oxidation**

*General procedure A (without addition of NEt<sub>3</sub>):* Allyl ether **4** (1.0 mmol) was dissolved in dry and degassed benzene (1.0 mL). Catalyst **A** (40 mg, 5 mol%) or **B** (45.5 mg, 5 mol%) was then added. Immediately after addition of the catalyst, the reaction vessel was immersed in an oil bath preheated to 40 °C (electronic temperature control) and stirred for 2 h. After this time, <sup>t</sup>BuOOH (5.5 M in decane, 720 μL, 4.0 mmol) was added to the reaction mixture via syringe pump within 15 min. After complete addition of the oxidant, the mixture was stirred for another 3 h. The reaction mixture was diluted with MTBE (50 mL), and MgSO<sub>4</sub> was added to absorb any water and Ru-residues. It was filtered and all volatiles were removed in vacuo. The residue was purified by column chromatography on silica. Each experiment was repeated at least two times.

*General procedure B (with addition of NEt<sub>3</sub>):* Allyl ether **4** (1.0 mmol) was dissolved in dry and degassed benzene (1.0 mL). Catalyst **A** (40 mg, 5 mol%) or **B** (45.5 mg, 5 mol%) was then added. Immediately after addition of the catalyst, the reaction vessel was immersed in an oil bath preheated to 40 °C (electronic temperature control) and stirred for 2 h. After this time, <sup>t</sup>BuOOH (5.5 M in decane, 720 μL, 4.0 mmol) was added to the reaction mixture via syringe pump within 15 min. After complete addition of the oxidant, the mixture was stirred for another 3 h. After this time, NEt<sub>3</sub> (2.5 mmol, 255 mg, 350 μL) was added, and the mixture was heated to 80 °C for 30 min. The reaction mixture was diluted with MTBE (50 mL), and MgSO<sub>4</sub> was added to absorb any water and Ru-residues. It was filtered and all volatiles were removed in vacuo. The residue was purified by column chromatography on silica. Each experiment was repeated at least two times.

## D Specific details, analytical data and copies of spectra for coumarins 2

### D1 2*H*-Chromen-2-one (**2a**)

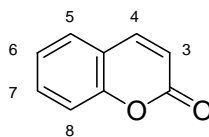

Following the general procedure A, 2*H*-chromen-2-one (**2a**) was obtained from **4a** (160 mg, 1.0 mmol) as a yellowish solid (with catalyst **A**: 85 mg, 58%, with catalyst **B**: 86 mg, 59%). Mp: 70 – 72°C;<sup>4</sup> <sup>1</sup>H-NMR:  $\delta$  7.72 (d, 1H,  $J = 9.6$ , H-4), 7.58 – 7.45 (2H, H-5, H-7), 7.37 – 7.24 (2H, H-6, H-8), 6.42 (d, 1H,  $J = 9.5$ , H-3); <sup>13</sup>C-NMR:  $\delta$  160.7 (0), 154.1 (0), 143.4 (1), 131.8 (1), 127.8 (1), 124.4 (1), 118.8 (0), 116.9 (1), 116.7 (1); IR (neat, cm<sup>-1</sup>):  $\tilde{\nu} = 3061$  (w), 2958 (w), 1711 (s), 1605 (s), 1453 (m), 1106 (m); HRMS (ESI): calcd for C<sub>9</sub>H<sub>7</sub>O<sub>2</sub> [M+H]<sup>+</sup>: 147.0446, found: 147.0451; MS (EI):  $m/z$  146 (M<sup>+</sup>, 92), 118 (100), 90 (32), 89 (39), 63 (25); Anal. calcd for C<sub>9</sub>H<sub>7</sub>O<sub>2</sub>: C: 73.97, H: 4.14; found: C: 73.80, H: 3.97.

<sup>4</sup> Reported in the literature: mp = 67-68°C; J. Oyamada and T. Kitamura, *Tetrahedron*, 2006, **62**, 6918-6925.

### $^1\text{H}$ NMR spectrum of 2a

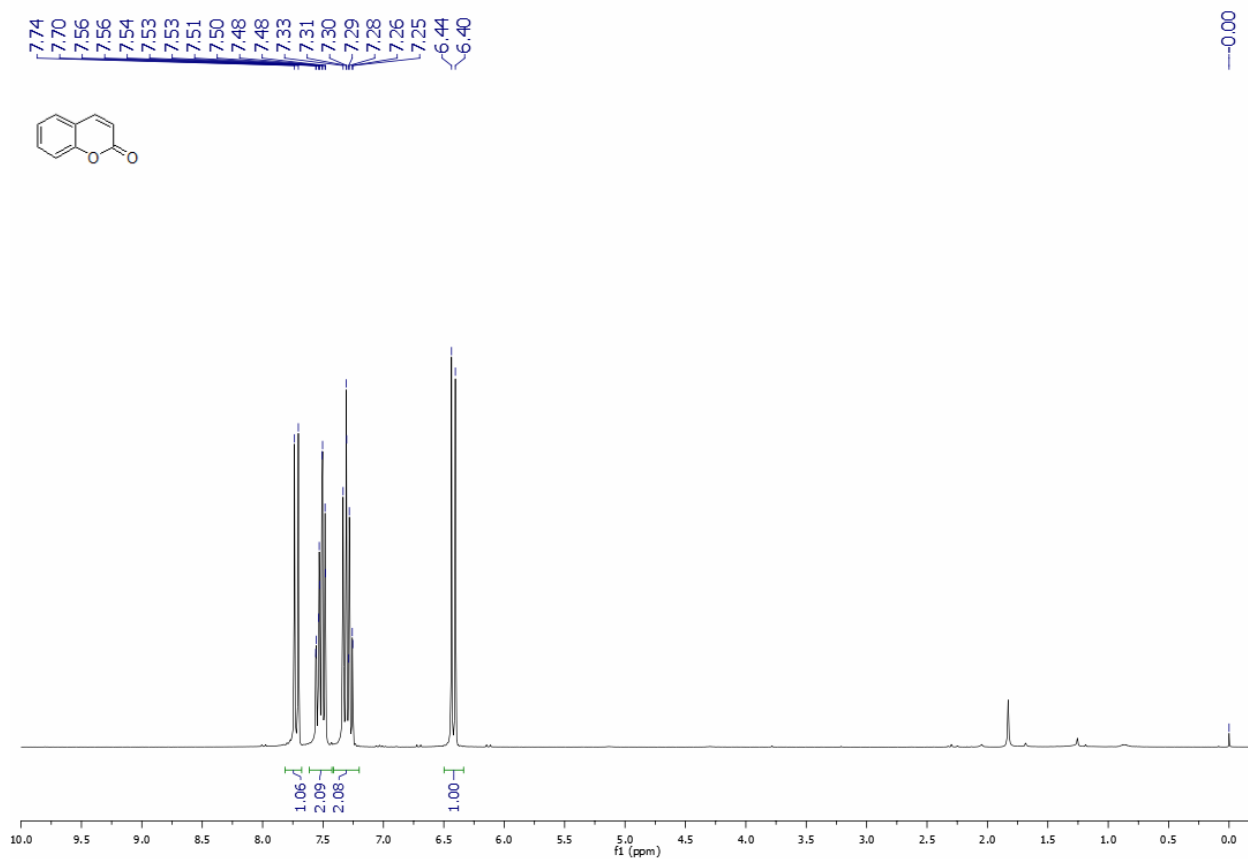

### $^{13}\text{C}$ NMR spectrum of 2a

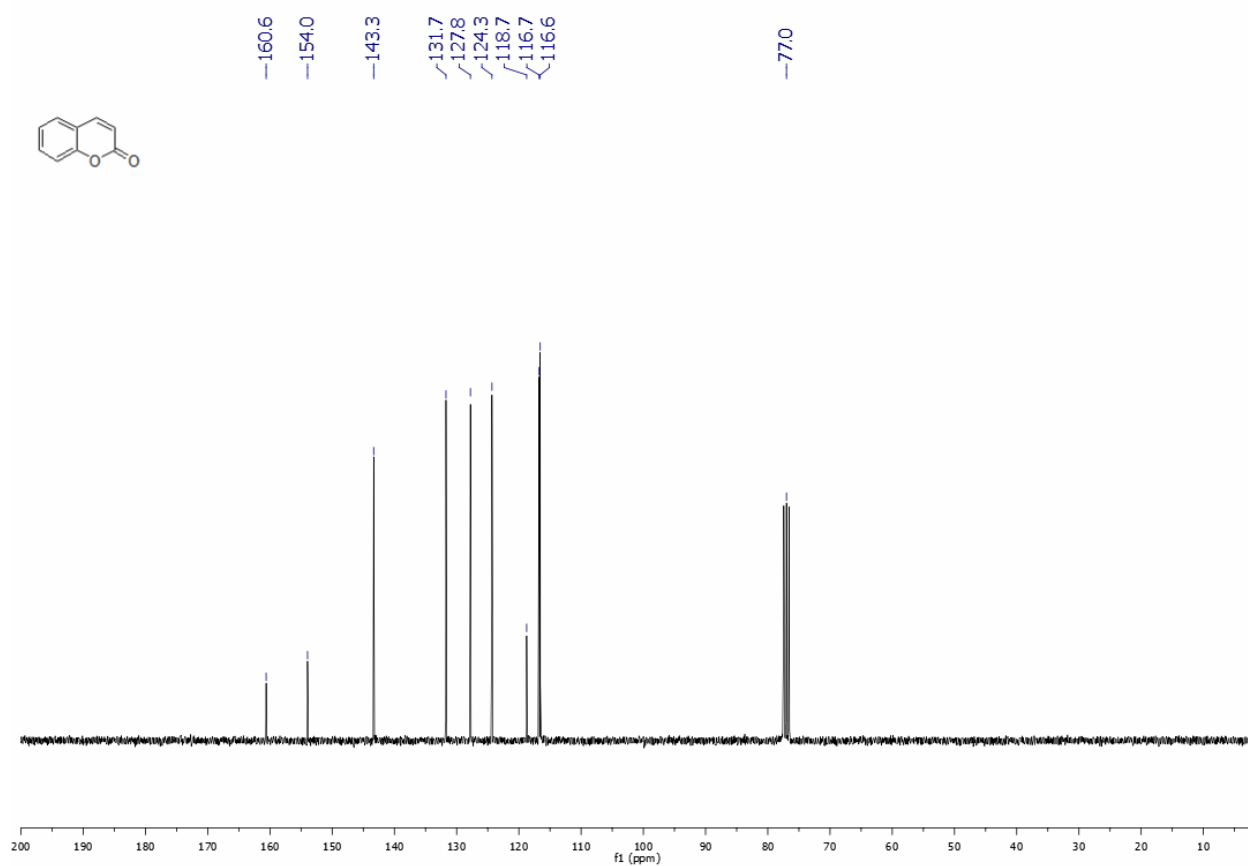



D2 6,8-Dibromo-2*H*-chromen-2-one (**2b**)

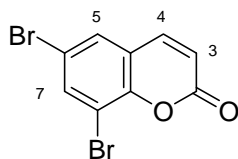

Following the general procedure A, 6,8-dibromo-2*H*-chromen-2-one (**2b**) was obtained from **4b** (159 mg, 0.5 mmol) together with the corresponding pyron **6b** (**2b** : **6b**, 10: 1) as a yellowish solid (with catalyst **A**: 85 mg, 56%, with catalyst **B**: 85 mg, 56%). Mp: 136 – 138°C;<sup>5</sup> <sup>1</sup>H-NMR:  $\delta$  7.89 (d, 1H,  $J = 2.2$ , H-5), 7.61 (d, 1H,  $J = 9.7$ , H-4), 7.58 (d, 1H,  $J = 2.2$ , H-7), 6.50 (d, 1H,  $J = 9.5$ , H-3); <sup>13</sup>C-NMR:  $\delta$  158.8 (0), 149.9 (0), 141.8 (1), 137.4 (1), 129.4 (1), 121.1 (0), 118.5 (1), 116.9 (0), 111.5 (0); IR (neat, cm<sup>-1</sup>):  $\tilde{\nu} = 3067$  (w), 1740 (s), 1655 (m), 1544 (m), 1442 (m), 1167 (m); HRMS (EI): calcd for C<sub>9</sub>H<sub>4</sub>O<sub>2</sub>[79]Br<sub>2</sub> [M]<sup>+</sup>: 301.8578, found: 301.8584; MS (EI):  $m/z$  306 (M<sup>+</sup>, 47), 304 (M<sup>+</sup>, 100), 302 (M<sup>+</sup>, 53), 278 (30), 276 (63), 274 (35), 197 (20), 195 (21), 169 (29), 167 (32); Anal. calcd for C<sub>9</sub>H<sub>4</sub>O<sub>2</sub>Br<sub>2</sub>: C: 35.57, H: 1.33; found: C: 35.79, H: 1.30.

<sup>5</sup> Reported in the literature: 160°C; M. J. Bhukta and P. I. Ittyerah, *J. Indian Chem. Soc.*, 1965, **42**, 454-456.

### <sup>1</sup>H NMR spectrum of 2b

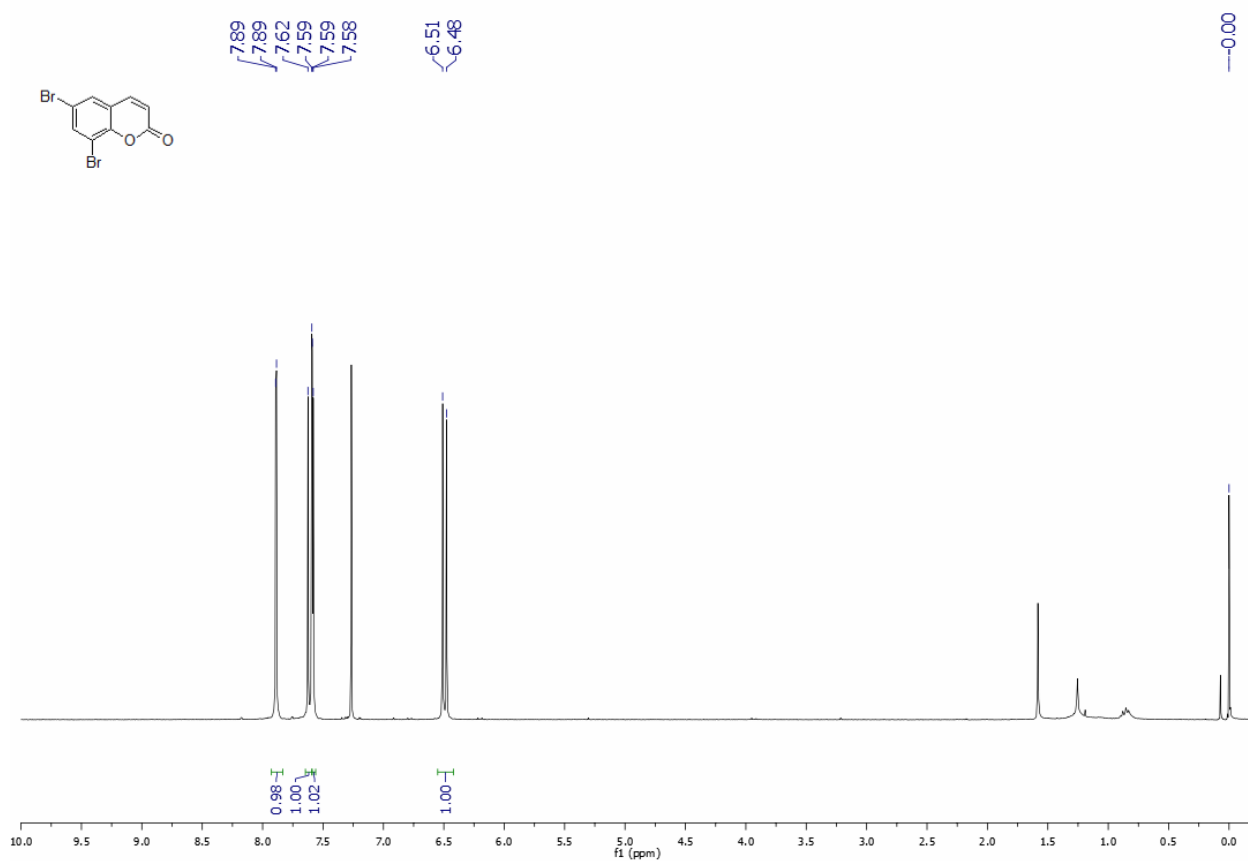

### <sup>13</sup>C NMR spectrum of 2b

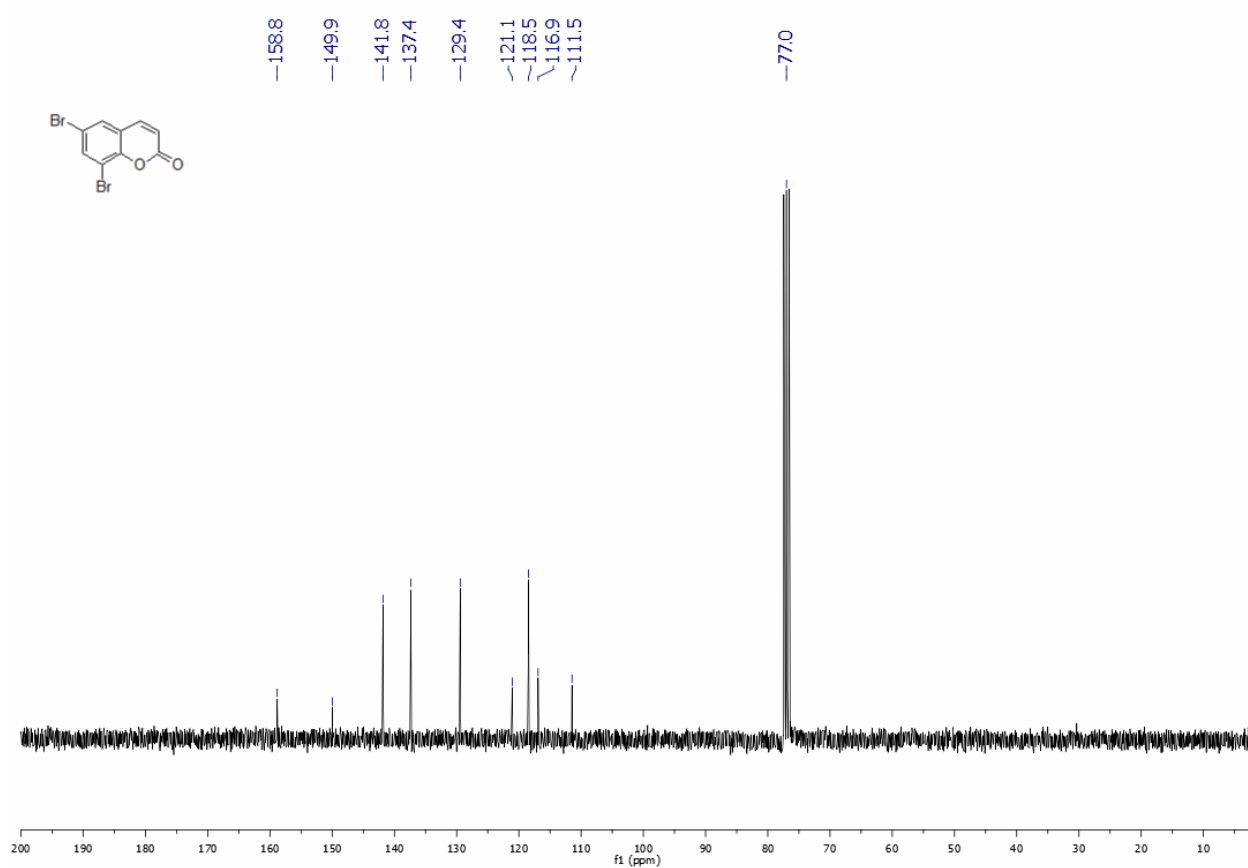

D3 8-Methoxy-2*H*-chromen-2-one (**2c**) and 2-(*tert*-butylperoxy)-8-methoxy-2*H*-chromene (**7c**)

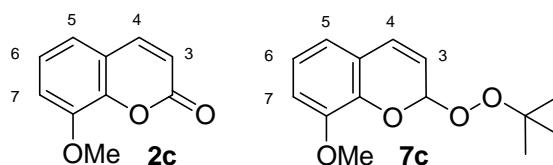

Following the general procedure A, 2-(*tert*-butylperoxy)-8-methoxy-2*H*-chromene (**7c**) and 8-methoxy-2*H*-chromen-2-one (**2c**) were synthesized from **4c** (190 mg, 1.0 mmol) using catalyst **A**. The products were separated by column chromatography on silica to give **7c** as a colourless liquid (43 mg, 17%) and **2c** as a yellowish solid (60 mg, 34%). *Analytical data for 2-(tert-butylperoxy)-8-methoxy-2H-chromene (7c)*:  $^1\text{H-NMR}$ :  $\delta$  6.92 (dd, 1H,  $J = 8.1, 7.1$ , H-6), 6.86 (dd, 1H,  $J = 8.1, 1.9$ , H-5), 6.80 (d, H,  $J = 9.6$ , H-4), 6.77 (dd, 1H,  $J = 7.5, 1.9$ , H-7), 6.23 (d, H,  $J = 4.1$ , H-2), 5.79 (dd, 1H,  $J = 9.6, 4.1$ , H-3), 3.90 (s, 3H,  $\text{OCH}_3$ ), 1.20 (s, 9H,  $\text{OC}(\text{CH}_3)_3$ );  $^{13}\text{C-NMR}$ :  $\delta$  148.3 (0), 140.7 (0), 129.2 (1), 121.1 (1), 121.1 (0), 119.2 (1), 115.5 (1), 112.4 (1), 97.0 (1), 81.2 (0), 55.9 (3), 26.2 (3, 3C); IR (neat,  $\text{cm}^{-1}$ ):  $\tilde{\nu} = 2976$  (m), 1641 (m), 1576 (m), 1480 (m), 1363 (m), 1268 (s), 1210 (s), 1192 (s); HRMS (EI): calcd for  $\text{C}_{14}\text{H}_{18}\text{O}_4$  [ $\text{M}$ ] $^+$ : 250.1205, found: 250.1202; MS (EI):  $m/z$  250 ( $\text{M}^+$ , 1), 161 (100), 146 (12), 134 (13), 85 (14), 83 (18), 79 (12), 77 (12), 57 (12), 43 (21); Anal. calcd for  $\text{C}_{14}\text{H}_{18}\text{O}_4$ : C: 67.18, H: 7.25; found: C: 66.83, H: 7.08. *Analytical data for 8-methoxy-2H-chromen-2-one (2c)*: Mp: 90 – 91°C; $^6$   $^1\text{H-NMR}$ :  $\delta$  7.70 (d, 1H,  $J = 9.6$ , H-4), 7.21 (dd, 1H,  $J = 8.0, 7.8$ , H-6), 7.09 (dd, H,  $J = 8.0, 1.4$ , H-5/H-7), 7.06 (dd, H,  $J = 7.5, 1.4$ , H-5/H-7), 6.43 (d, 1H,  $J = 9.6$ , H-3), 3.96 (s, 3H,  $\text{OCH}_3$ );  $^{13}\text{C-NMR}$ :  $\delta$  160.1 (0), 147.2 (0), 143.7 (0), 143.5 (1), 124.21 (1), 119.4 (0), 119.2 (1), 116.8 (1), 113.8 (1), 56.2 (3); IR (neat,  $\text{cm}^{-1}$ ):  $\tilde{\nu} = 2933$  (w), 2847 (w), 1724 (s), 1608 (m), 1571 (m), 1467 (s), 1273 (s); HRMS (EI): calcd for  $\text{C}_{10}\text{H}_8\text{O}_3$  [ $\text{M}$ ] $^+$ : 176.0473, found: 176.0482; MS (EI):  $m/z$  176 ( $\text{M}^+$ , 100), 161 (24), 148 (32), 147 (18), 133 (43), 105 (42), 77 (41), 51 (47), 50 (23); Anal. calcd for  $\text{C}_{10}\text{H}_8\text{O}_3$ : C: 68.18, H: 4.58; found: C: 67.86, H: 4.39.

<sup>6</sup> Reported in the literature: 86-87°C°C; J. A. Panetta and H. Rapoport, *J. Org. Chem.*, 1982, **47**, 946-950.

### <sup>1</sup>H NMR spectrum of 7c

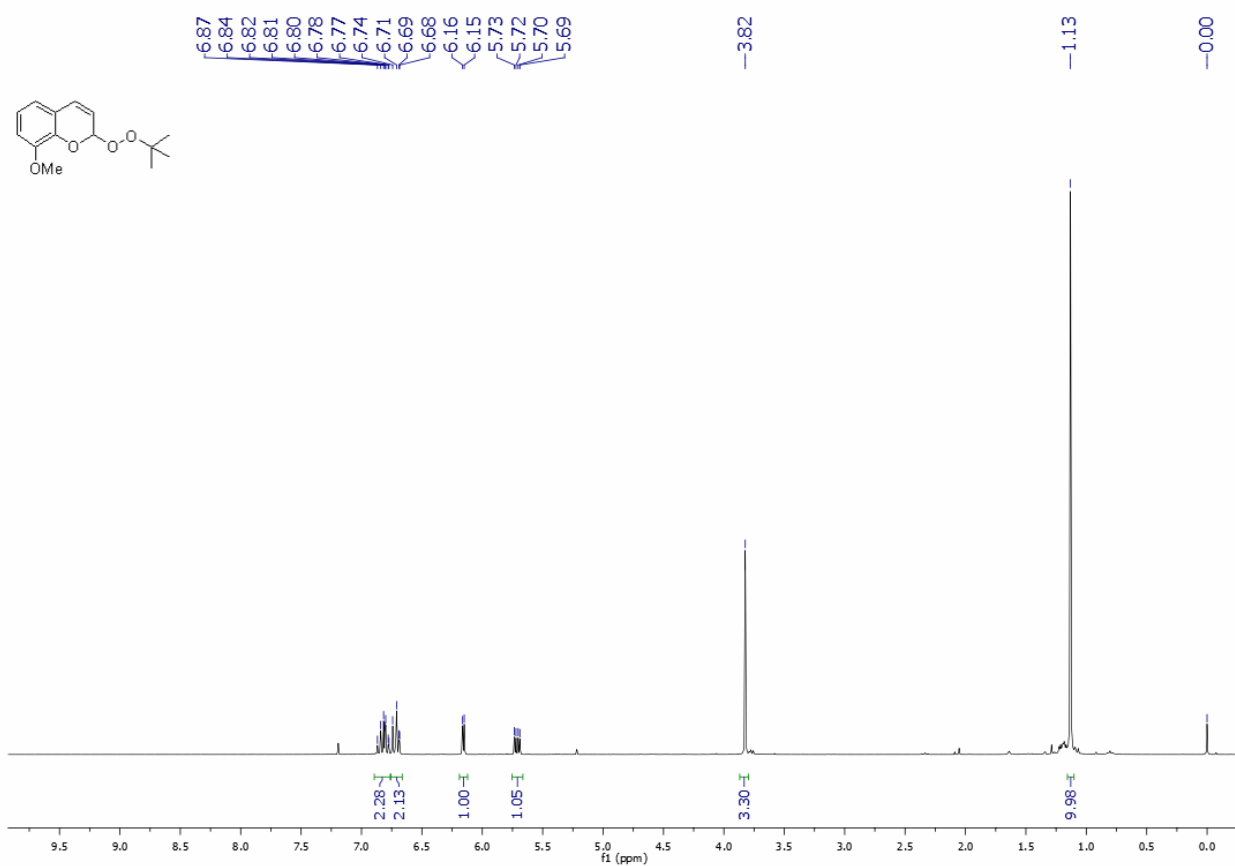

### <sup>13</sup>C NMR spectrum of 7c

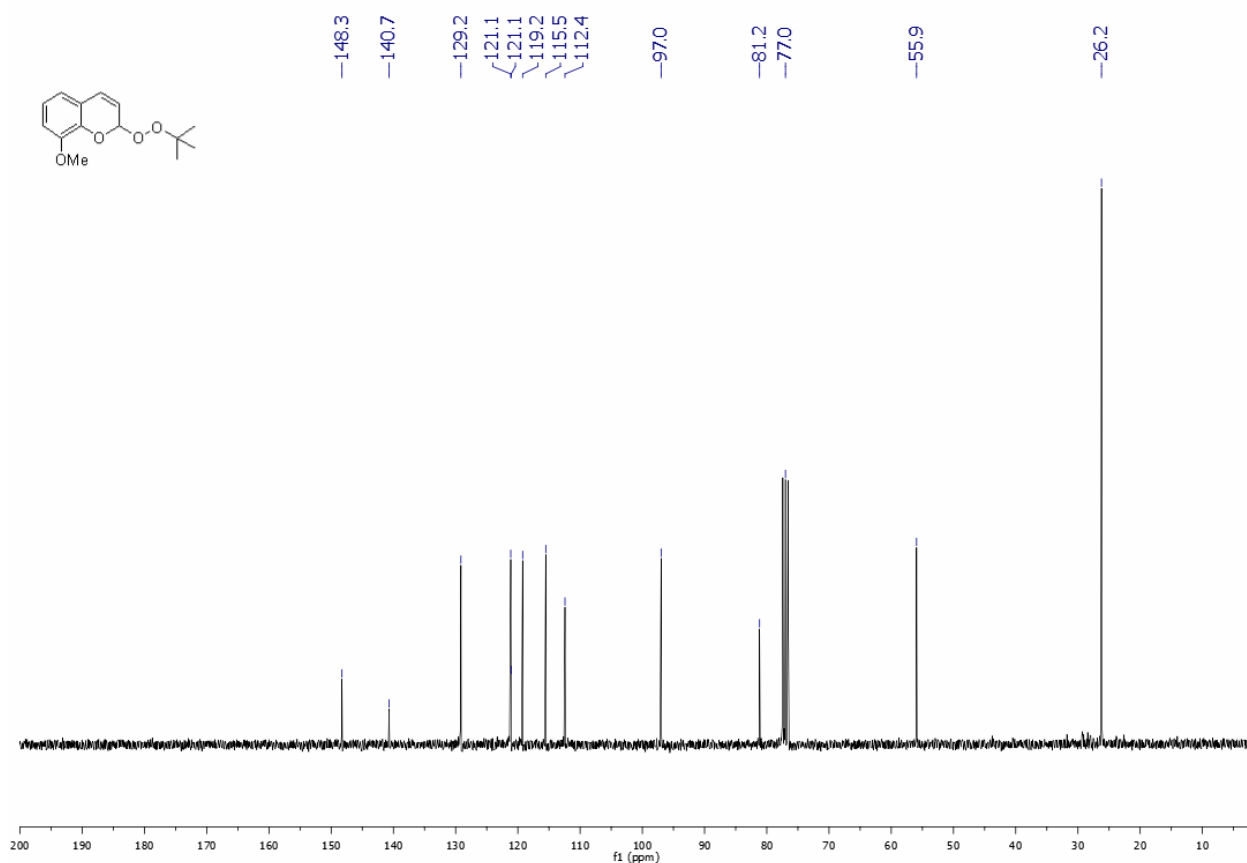

### <sup>1</sup>H NMR spectrum of 2c

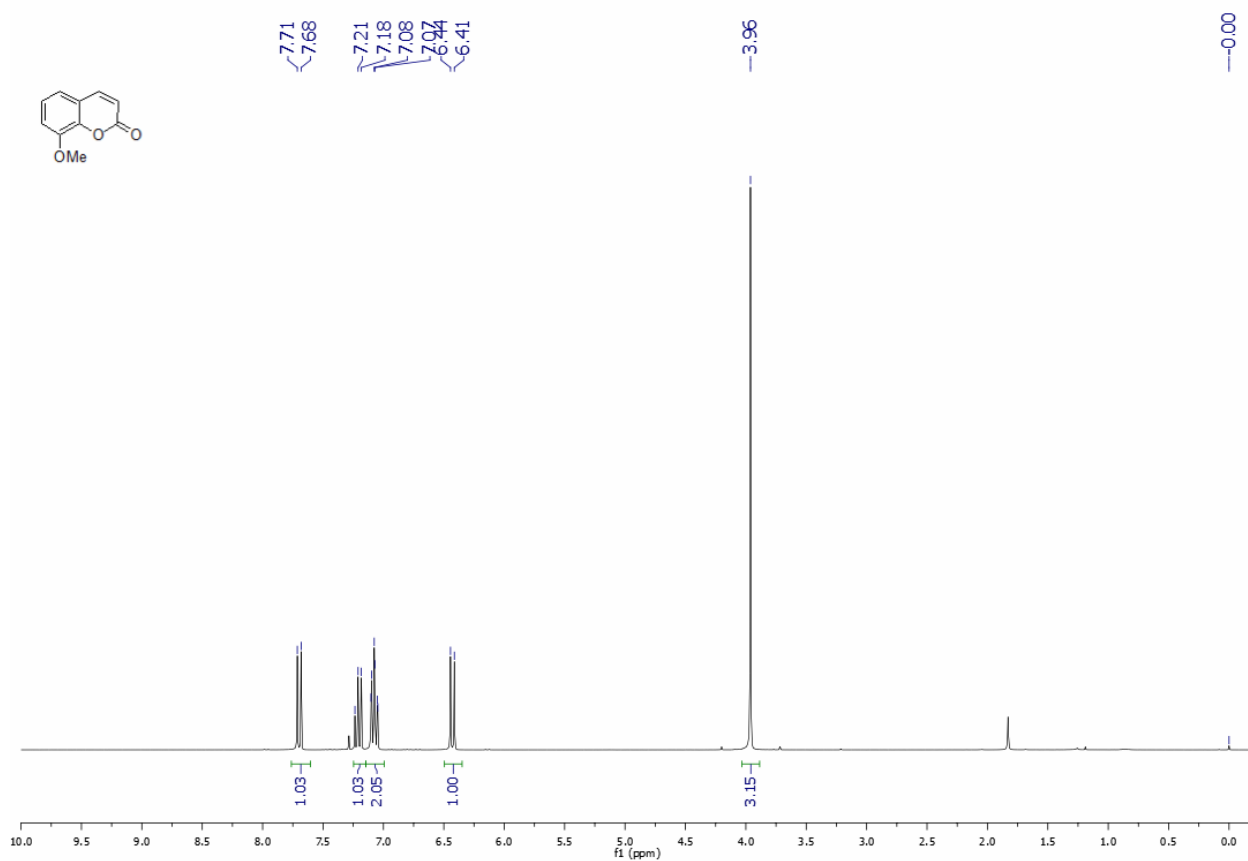

### <sup>13</sup>C NMR spectrum of 2c

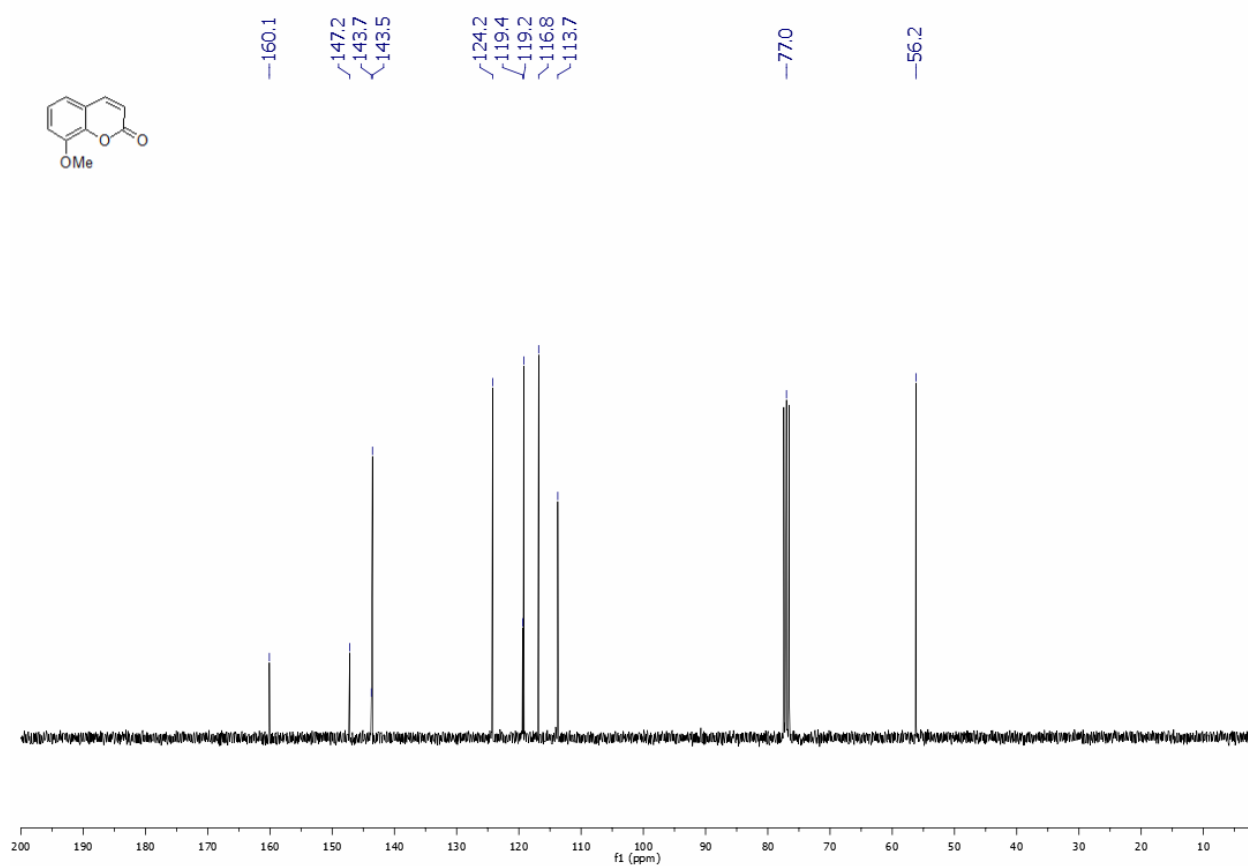

D4 Synthesis of 8-methoxy-2*H*-chromen-2-one (**2c**) with subsequent peroxide decomposition

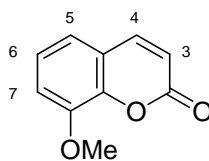

Following the general procedure B, 8-methoxy-2*H*-chromen-2-one (**2c**) was obtained from **4c** (190 mg, 1.0 mmol) as a yellowish solid (with catalyst **A**: 97 mg, 55%, with catalyst **B**: 100 mg, 57%). Analytical data for **2c** synthesized via this protocol are identical to those reported above.

D5 8-Ethoxy-2*H*-chromen-2-one (**2d**) and 2-(*tert*-butylperoxy)-8-ethoxy-2*H*-chromene (**7d**)

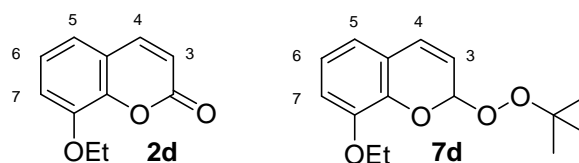

Following the general procedure A, 2-(*tert*-butylperoxy)-8-ethoxy-2*H*-chromene (**7d**) and 8-ethoxy-2*H*-chromen-2-one (**2d**) were synthesized from **4d** (204 mg, 1.0 mmol) using catalyst **A**. The products were separated by column chromatography on silica to give **7d** as a colourless liquid (40 mg, 15%) and **2d** as a yellowish solid (72 mg, 38%). *Analytical data of 2-(tert-butylperoxy)-8-ethoxy-2H-chromene (7d)*: <sup>1</sup>H-NMR: δ 6.92 – 6.83 (2H, H-6, H-7), 6.79 (d, 1H, *J* = 9.6, H-4), 6.76 (dd, 1H, *J* = 6.5, 1.7, H-5), 6.24 (d, 1H, *J* = 4.1, H-2), 5.78 (dd, 1H, *J* = 9.6, 4.1, H-3), 4.17 (dq, 1H, *J* = 9.6, 7.0, OCHHCH<sub>3</sub>), 4.11 (dq, 1H, *J* = 9.6, 7.0, OCHHCH<sub>3</sub>), 1.46 (t, 3H, *J* = 7.0, OCH<sub>2</sub>CH<sub>3</sub>), 1.21 (s, 9H, OC(CH<sub>3</sub>)<sub>3</sub>); <sup>13</sup>C-NMR: δ 147.5 (0), 141.1 (0), 129.2 (1), 121.3 (0), 121.1 (1), 119.3 (1), 115.6 (1), 114.1 (1), 96.9 (1), 81.0 (0), 64.5 (2), 26.3 (3, 3C), 14.9 (3); IR (neat, cm<sup>-1</sup>):  $\tilde{\nu}$  = 2977 (m), 2932 (w), 1576 (m), 1471 (s), 1393 (m), 1363 (m), 1270 (s), 1210 (s); HRMS (EI): calcd for C<sub>15</sub>H<sub>20</sub>O<sub>4</sub> [M]<sup>+</sup>: 264.1362, found: 264.1347; MS (EI): *m/z* 264 (M<sup>+</sup>, 1), 175 (100), 147 (20), 134 (17), 107 (11), 77 (14), 57 (10), 43 (17); Anal. calcd for C<sub>15</sub>H<sub>20</sub>O<sub>4</sub>: C: 68.16 H: 7.63; found: C: 68.11 H: 7.72. *Analytical data of 8-Ethoxy-2H-chromen-2-one (2d)*: Mp: 69 – 70°C; <sup>1</sup>H-NMR: δ 7.69 (d, 1H, *J* = 9.5, H-4), 7.17 (d, 1H, *J* = 7.7, H-5/7), 7.10 – 7.02 (2H, H-5/7, H-6), 6.42 (d, 1H, *J* = 9.6, H-3), 4.18 (q, 2H, *J* = 7.0, OCH<sub>2</sub>CH<sub>3</sub>), 1.50 (t, 3H, *J* = 7.0, OCH<sub>2</sub>CH<sub>3</sub>); <sup>13</sup>C-NMR: δ 160.4 (0), 146.5 (0), 143.9 (0), 143.6 (1), 124.2 (1), 119.5 (0), 119.2 (1), 116.7 (1), 115.0 (1), 64.9 (2), 14.7 (3); IR (neat, cm<sup>-1</sup>):  $\tilde{\nu}$  = 3437 (w), 3083 (w), 2980 (w), 2933 (w), 1720 (s), 1605 (m), 1570 (m), 1462 (s), 1393 (m); HRMS (EI): calcd for C<sub>11</sub>H<sub>10</sub>O<sub>3</sub> [M]<sup>+</sup>: 190.0630, found: 190.0619; MS (EI): *m/z* 190 (M<sup>+</sup>, 45), 162 (90), 134 (100), 105 (19), 78 (28), 77 (31), 51 (24); Anal. calcd for C<sub>11</sub>H<sub>10</sub>O<sub>3</sub>: C: 69.46, H: 5.30; found: C: 69.07, H: 5.15.

### <sup>1</sup>H NMR spectrum of 7d

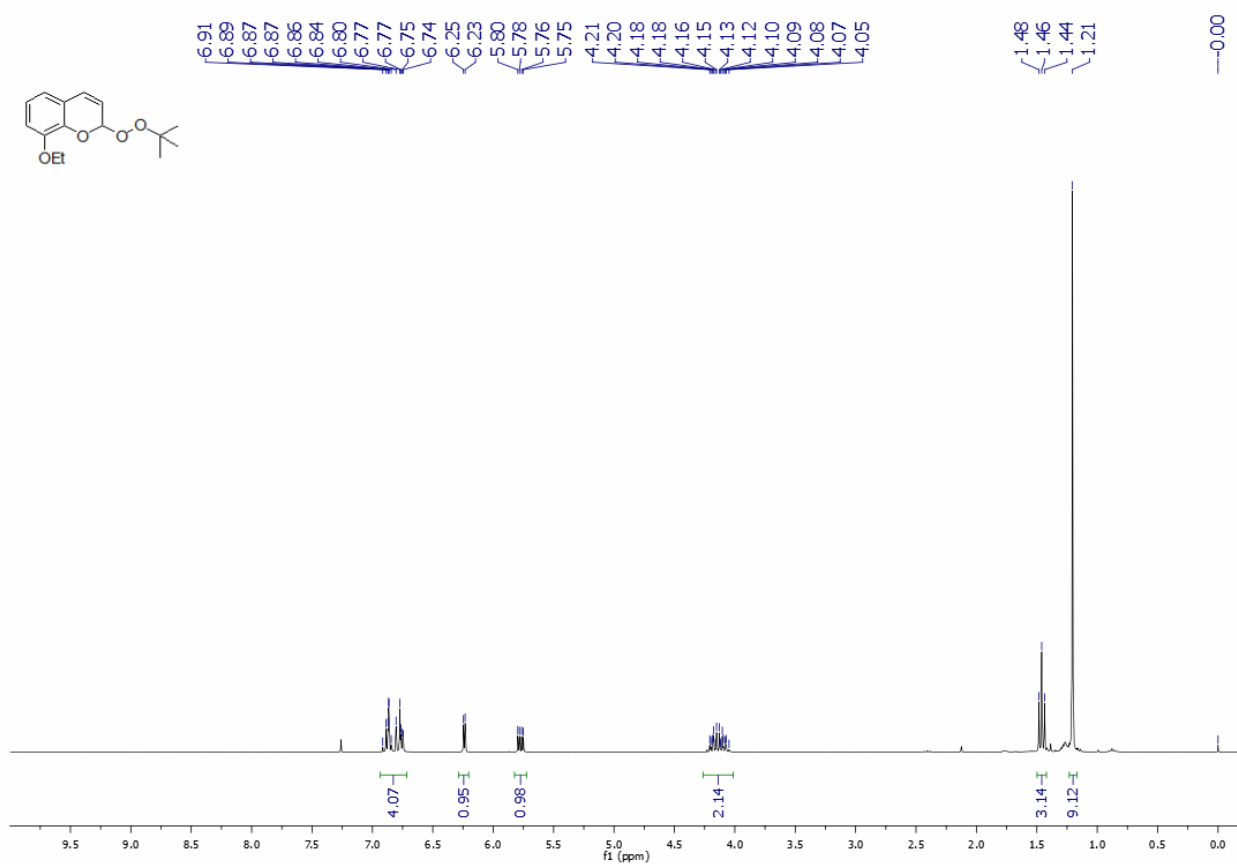

### <sup>13</sup>C NMR spectrum of 7d

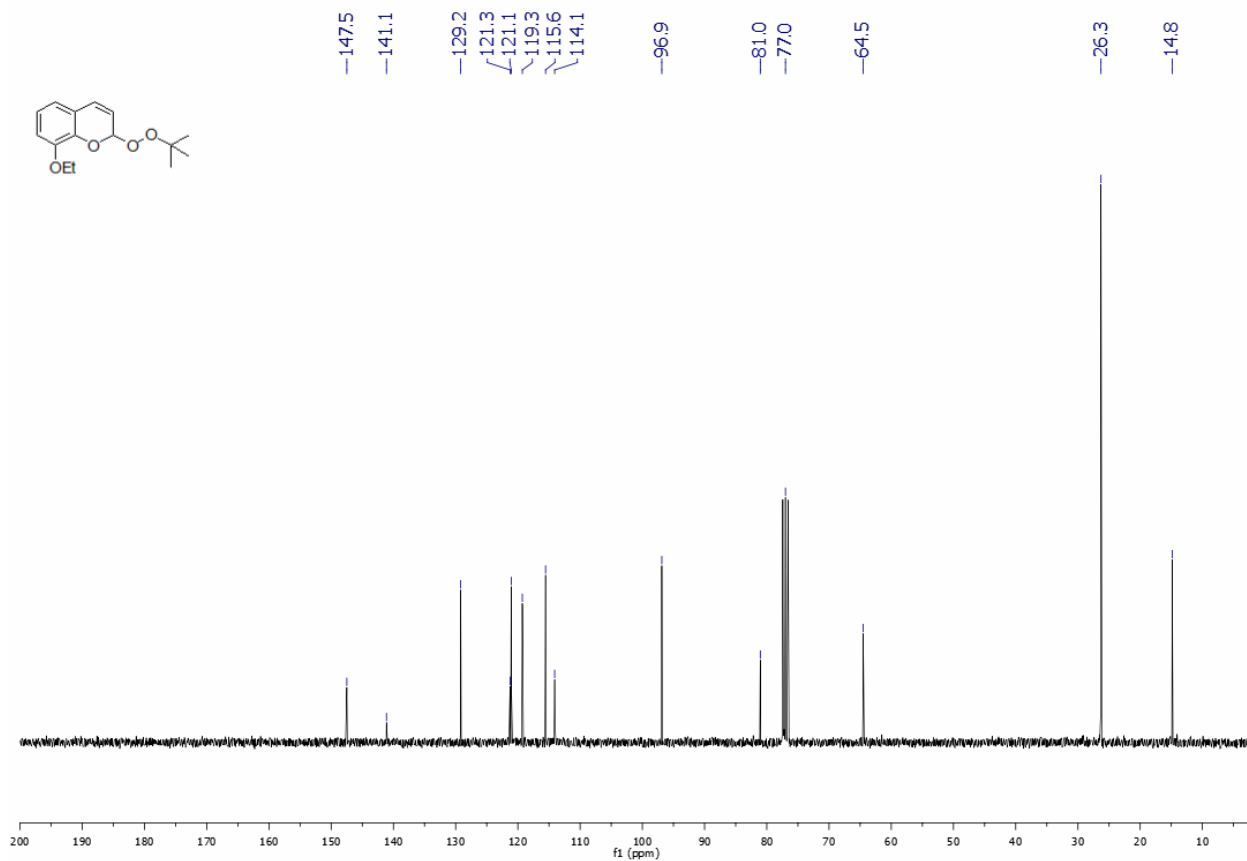



### $^1\text{H}$ NMR spectrum of 2d

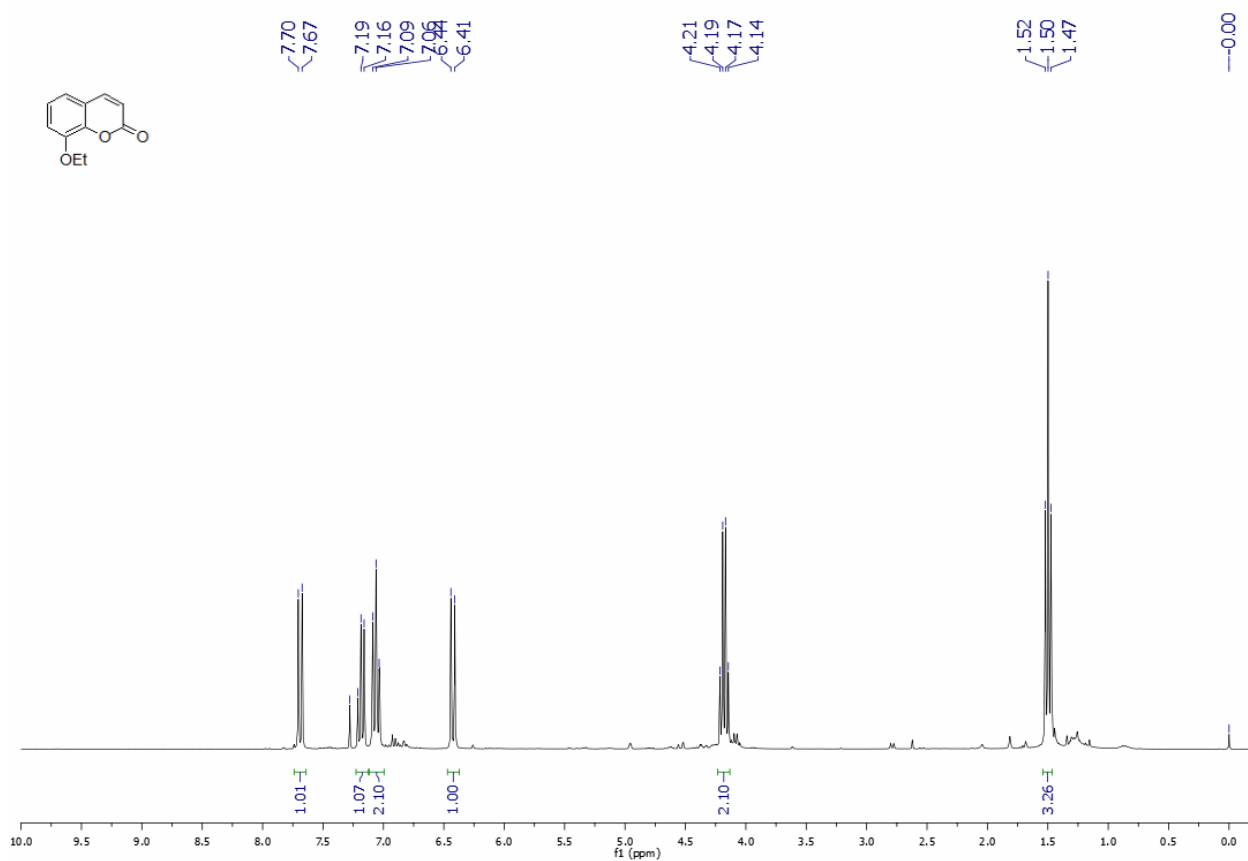

### $^{13}\text{C}$ NMR spectrum of 2d

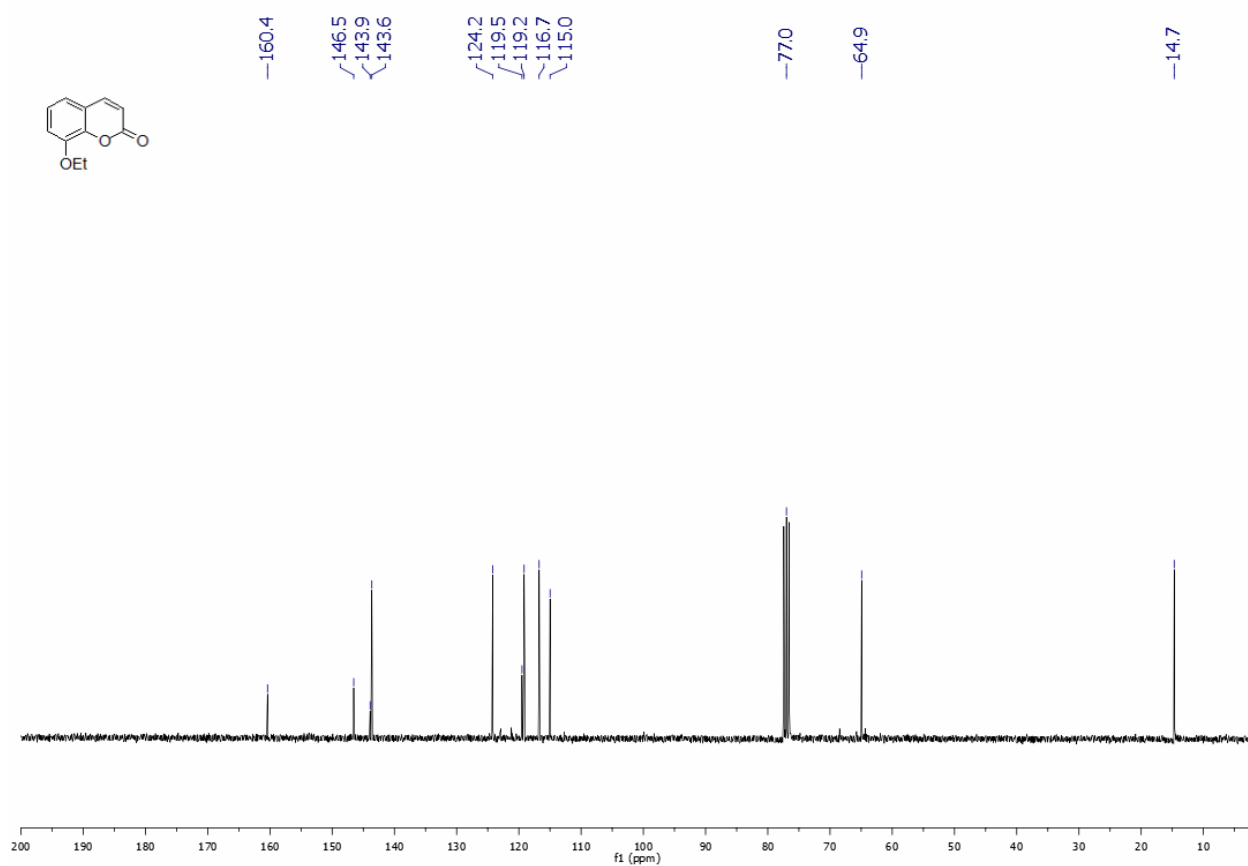

D6 Synthesis of 8-ethoxy-2*H*-chromen-2-one (**2d**) with subsequent peroxide decomposition

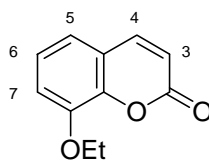

Following the general procedure B, 8-Ethoxy-2*H*-chromen-2-one (**2d**) was obtained from **4d** (204 mg, 1.0 mmol) as a yellowish solid (with catalyst **A**: 97 mg, 51%, with catalyst **B**: 97 mg, 51%). Analytical data for **2d** synthesized via this protocol are identical to those reported above.

D7 7-Methoxy-2*H*-chromen-2-one (**2e**)

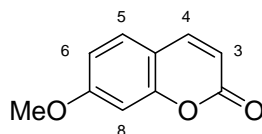

7-Methoxy-2*H*-chromen-2-one (**2e**) was synthesized following the general procedure A, using an initial concentration of **4e** (190 mg, 1.0 mmol) of 0.1 M. **2e** was obtained as a yellowish solid (with catalyst **A**: 71 mg, 40%, with catalyst **B**: 71 mg, 40%). Mp: 121 – 123°C;<sup>7</sup> <sup>1</sup>H-NMR:  $\delta$  7.64 (d, 1H,  $J = 9.6$ , H-4), 7.38 (d, 1H,  $J = 8.5$ , H-5), 6.84 (dd, 1H,  $J = 8.5, 2.4$ , H-6), 6.80 (d, 1H,  $J = 2.3$ , H-8), 6.24 (d, 1H,  $J = 9.5$ , H-3), 3.87 (s, 3H, OCH<sub>3</sub>); <sup>13</sup>C-NMR:  $\delta$  162.8 (0), 161.1 (0), 155.8 (0), 143.3 C(1), 128.7 (1), 113.0 (0), 112.5 (1, 2C), 100.8 (1), 55.7 (3); IR (neat, cm<sup>-1</sup>):  $\tilde{\nu} = 2936$  (w), 1727 (s), 1609 (s), 1556 (m), 1507 (m), 1282 (m); HRMS (EI): calcd for C<sub>10</sub>H<sub>8</sub>O<sub>3</sub> [M]<sup>+</sup>: 176.0473, found: 176.0456; MS (EI):  $m/z$  176 (M<sup>+</sup>, 93), 148 (100), 133 (76), 105 (15), 77 (19), 51 (13); Anal. calcd for C<sub>10</sub>H<sub>8</sub>O<sub>3</sub>: C: 68.18, H: 4.58; found: C: 67.59, H: 4.33.

<sup>7</sup> Reported in the literature: mp = 117-118°C; J. Oyamada and T. Kitamura, *Tetrahedron*, 2006, **62**, 6918-6925.

### $^1\text{H}$ NMR spectrum of 2e

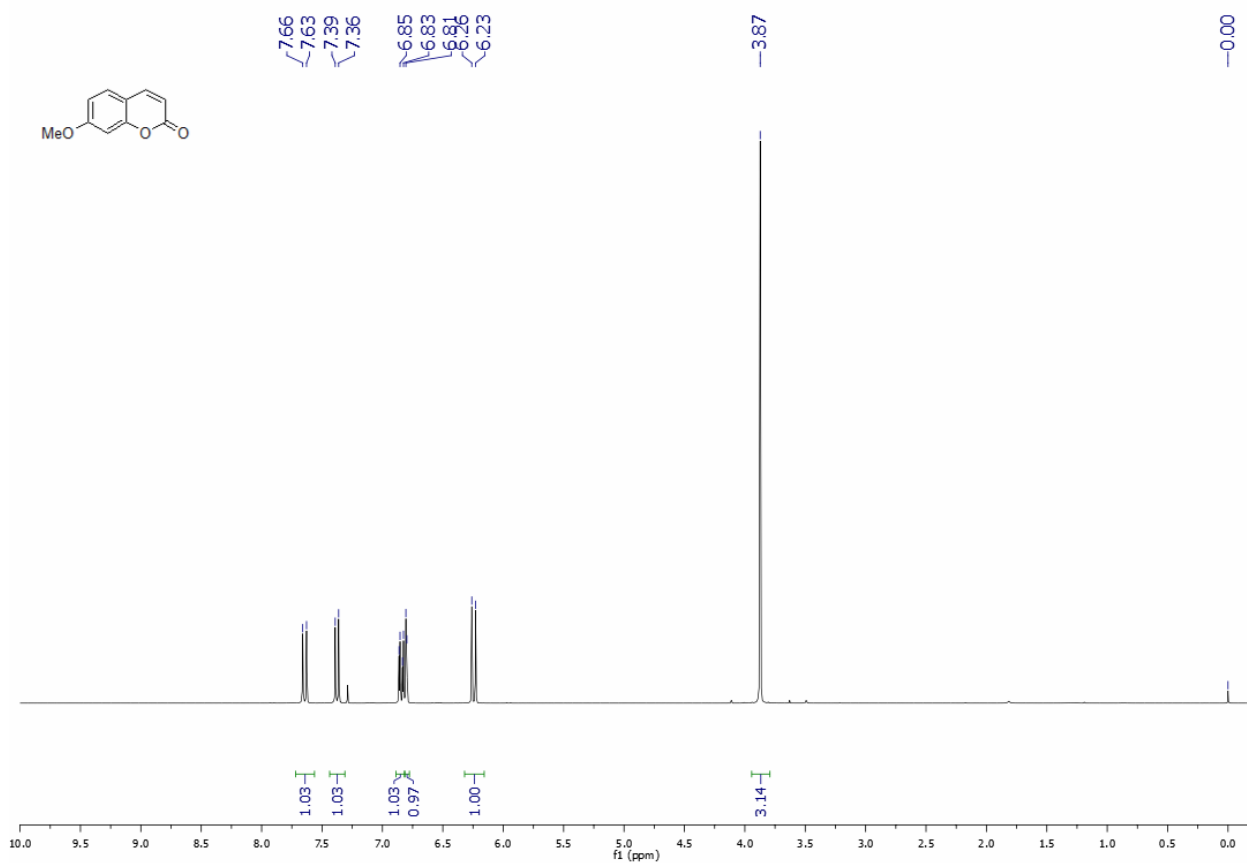

### $^{13}\text{C}$ NMR spectrum of 2e

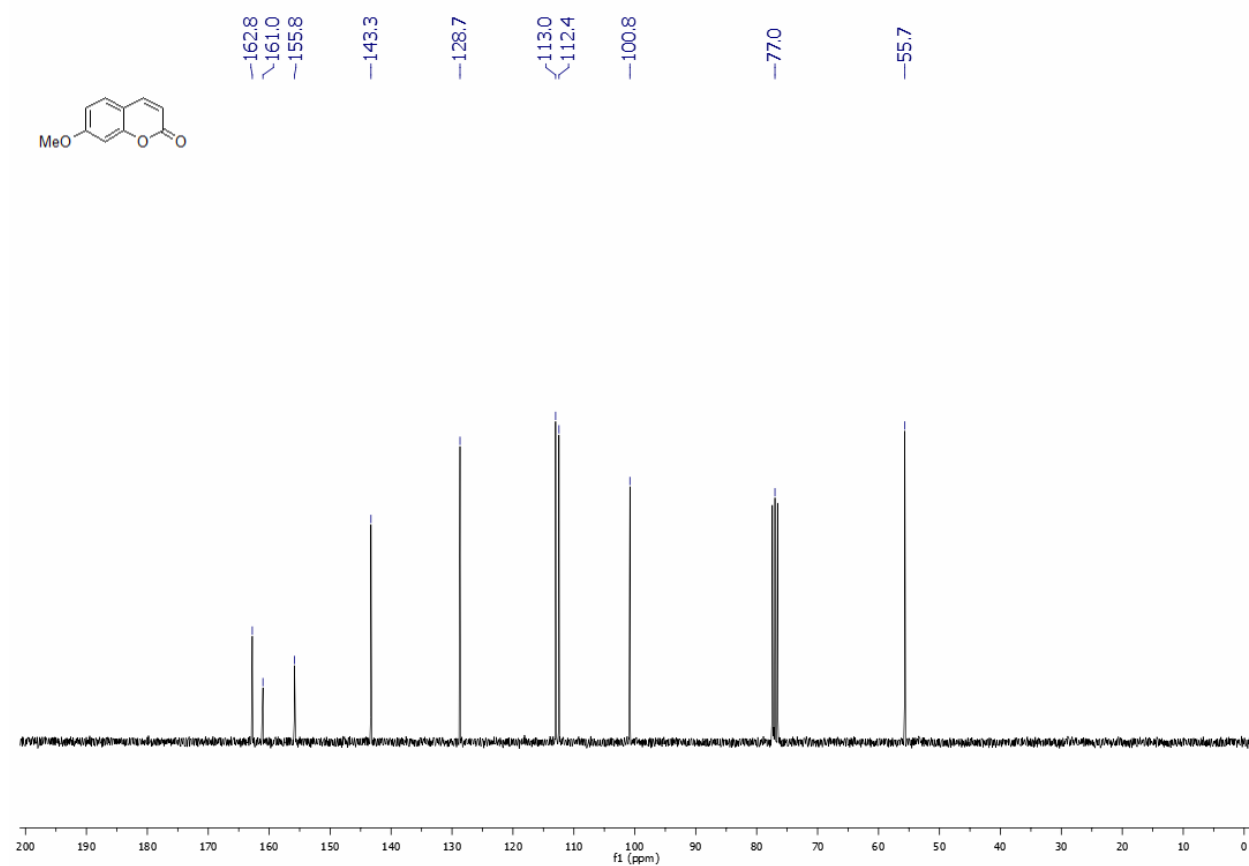

D8 6-Nitro-2*H*-chromen-2-one (**2f**)

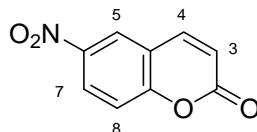

Following the general procedure A, 6-nitro-2*H*-chromen-2-one (**2f**) was obtained from **4f** (205 mg, 1.0 mmol) as a yellowish solid (with catalyst **A**: 120 mg, 63%, with catalyst **B**: 120 mg, 63%). Mp = 180-182°C;<sup>8</sup> <sup>1</sup>H-NMR:  $\delta$  8.46 (d, 1H,  $J = 2.6$ , H-5), 8.41 (dd, 1H,  $J = 9.0, 2.6$ , H-7), 7.84 (d, 1H,  $J = 9.7$ , H-4), 7.48 (d, 1H,  $J = 9.0$ , H-8), 6.60 (d, 1H,  $J = 9.7$ , H-3); <sup>13</sup>CNMR:  $\delta$  158.8 (0), 157.5 (0), 144.0 (0), 142.2 (1), 126.6 (1), 123.7 (1), 118.8 (1), 118.8 (0), 118.0 (1); IR (neat, cm<sup>-1</sup>):  $\tilde{\nu}$  = 3071 (w), 1736 (s), 1615 (s), 1517 (s), 1340 (s); HRMS (EI): calcd for C<sub>9</sub>H<sub>5</sub>O<sub>4</sub>N [M]<sup>+</sup>: 191.0219, found: 191.0219; MS (EI): m/z 191 (M<sup>+</sup>, 67), 190 (19), 176 (28), 166 (27), 163 (27), 161 (22), 133 (40), 118 (22), 117 (49), 105 (23), 89 (75), 85 (41), 83 (39), 71 (55), 69 (38), 63 (64), 57 (44), 43 (51), 41 (73), 40 (100); Anal. calcd for C<sub>9</sub>H<sub>5</sub>O<sub>4</sub>N: C: 56.55, H: 2.64, N: 7.33; found: C: 56.37, H: 2.67, N: 7.25.

<sup>8</sup> Reported in the literature: 181-182°C; F. Jafarpour, N. Jalalimanesh, M. B. A. Olia and A. O. Kashani, *Tetrahedron*, 2010, **66**, 9508-9511.

### <sup>1</sup>H NMR spectrum of 2f

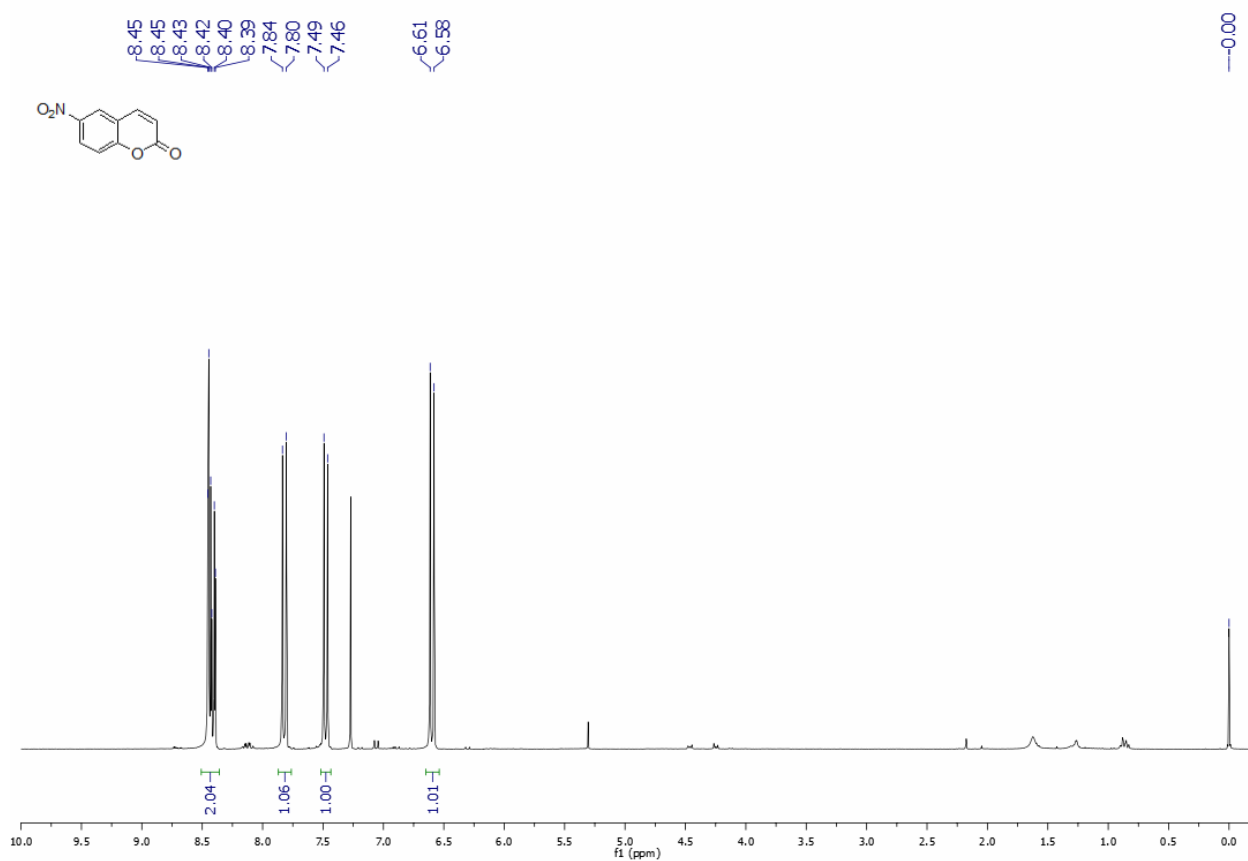

### <sup>13</sup>C NMR spectrum of 2f

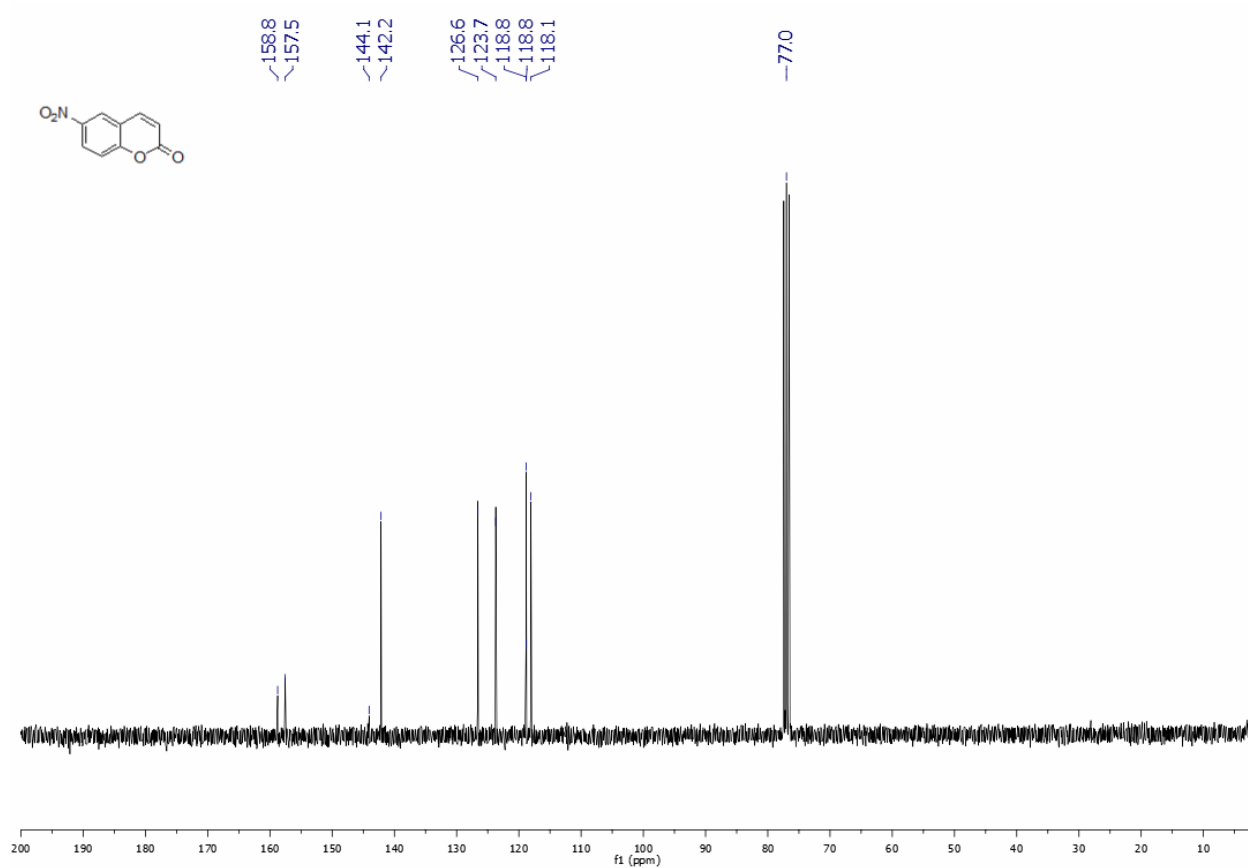

D9 6-Bromo-2*H*-chromen-2-one (**2g**)

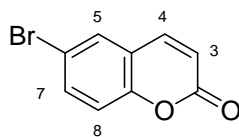

Following the general procedure A, 6-bromo-2*H*-chromen-2-one (**2g**) was obtained from **4g** (239 mg, 1.0 mmol) as a yellowish solid (with catalyst **A**: 137 mg, 61%, with catalyst **B**: 140 mg 62%). Mp: 157 – 159°C;<sup>9</sup> <sup>1</sup>H-NMR:  $\delta$  7.67 – 7.58 (3H, H-5, H-7, H-8), 7.22 (d, 1H,  $J$  = 9.7, H-4), 6.47 (d, 1H,  $J$  = 9.6, H-3); <sup>13</sup>C-NMR:  $\delta$  159.9 (0), 152.9 (0), 142.0 (1), 134.5 (1), 130.1 (1), 120.3 (0), 118.6 (1), 117.8 (1), 116.9 (0); IR (neat, cm<sup>-1</sup>):  $\tilde{\nu}$  = 3086 (w), 1721(s), 1600 (w), 1557 (w), 1476 (w); HRMS (EI): calcd for C<sub>9</sub>H<sub>5</sub>O<sub>2</sub>[79]Br [M]<sup>+</sup>: 223.9473, found: 223.9493; MS (EI):  $m/z$  226 (M<sup>+</sup>, 88), 224 (M<sup>+</sup>, 100), 198 (57), 196 (53), 117 (31), 89 (50), 62 (27); Anal. calcd for C<sub>9</sub>H<sub>5</sub>O<sub>2</sub>Br: C: 48.03, H: 2.24; found: C: 47.98, H: 2.14.

<sup>9</sup> Reported in the literature: mp = 160-163°C; J. Oyamada and T. Kitamura, *Tetrahedron*, 2006, **62**, 6918-6925.

### <sup>1</sup>H NMR spectrum of 2g

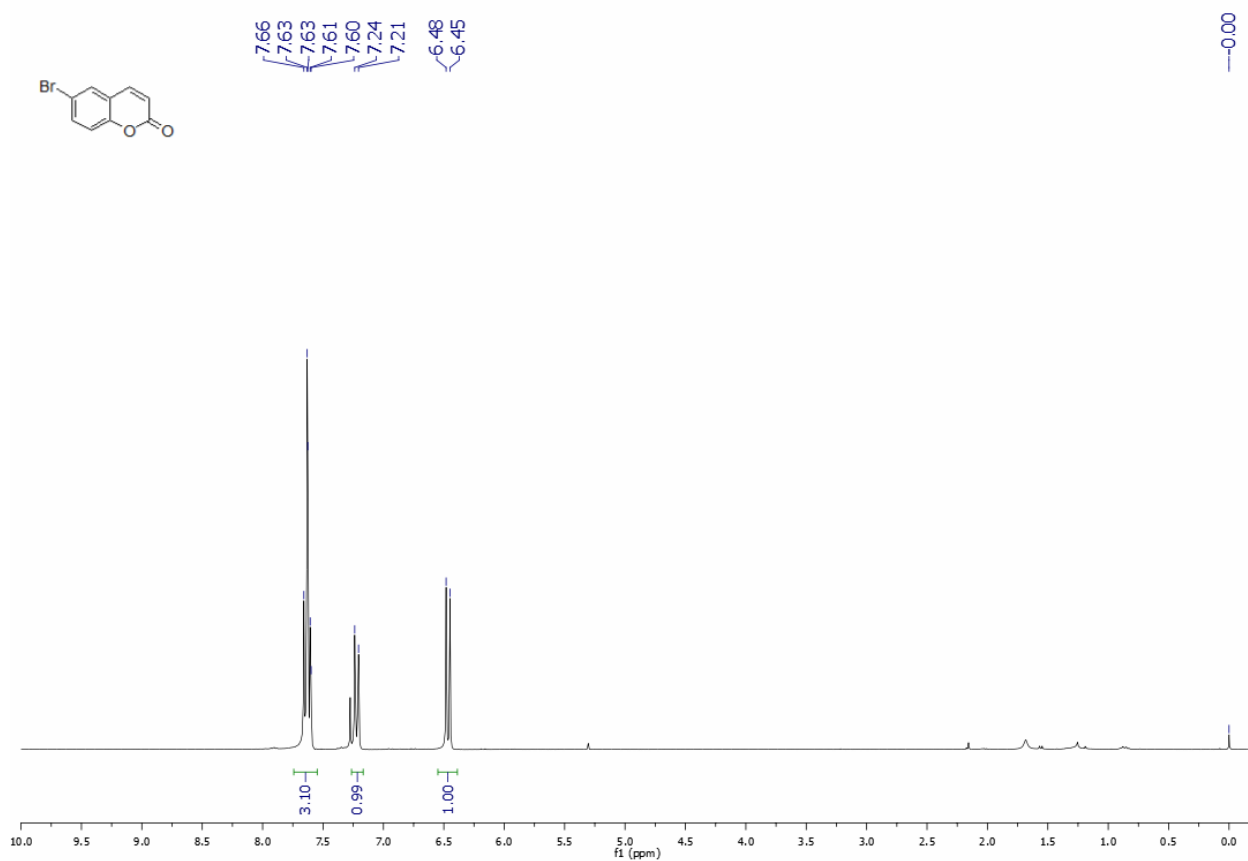

### <sup>13</sup>C NMR spectrum of 2g

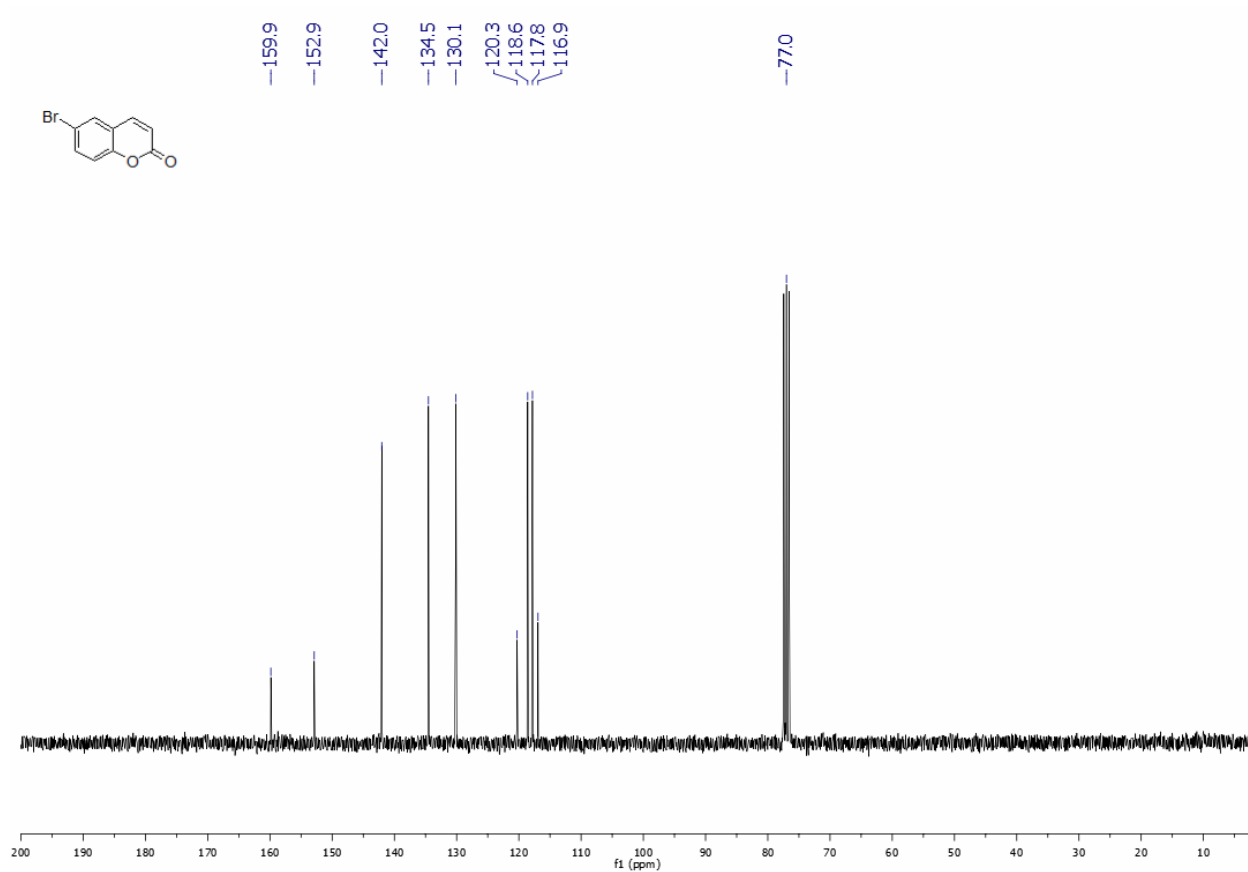



D10 6-Methyl-2*H*-chromen-2-one (**2h**)

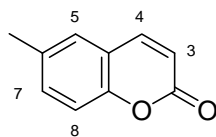

Following the general procedure A, 6-methyl-2*H*-chromen-2-one (**2h**) was obtained from **4h** (174 mg, 1.0 mmol) as a yellowish solid (with catalyst **A**: 83 mg, 52%, with catalyst **B**: 80 mg, 50%). Mp: 76 – 78 °C;<sup>10</sup> <sup>1</sup>H-NMR:  $\delta$  7.66 (d, 1H,  $J = 9.5$ , H-4), 7.32 (dd, 1H,  $J = 8.4$ , 1.9, H-8), 7.26 (s (br), 1H, H-5), 7.18 (d, 1H,  $J = 8.4$ , H-7), 6.38 (d, 1H,  $J = 9.6$ , H-3), 2.39 (s, 3H,  $CH_3$ ); <sup>13</sup>C-NMR:  $\delta$  160.8 (0), 152.0 (0), 143.2 (1), 133.9 (0), 132.6 (1), 127.5 (1), 118.4 (0), 116.3 (1, 2C), 20.5 (3); IR (neat,  $cm^{-1}$ ):  $\tilde{\nu} = 3077$  (w), 2926 (w), 1716 (s), 1622 (m), 1573 (m); HRMS (EI): calcd for  $C_{10}H_8O_2$   $[M]^+$ : 160.0524, found: 160.0513; MS (EI):  $m/z$  160 ( $M^+$ , 75), 132 (100), 131 (100), 104 (33), 103 (24), 78 (23), 77 (32), 51 (24).

<sup>10</sup> Reported in the literature: mp = 73.5-74°C; J. Oyamada and T. Kitamura, *Tetrahedron*, 2006, **62**, 6918-6925.

### $^1\text{H}$ NMR spectrum of 2h

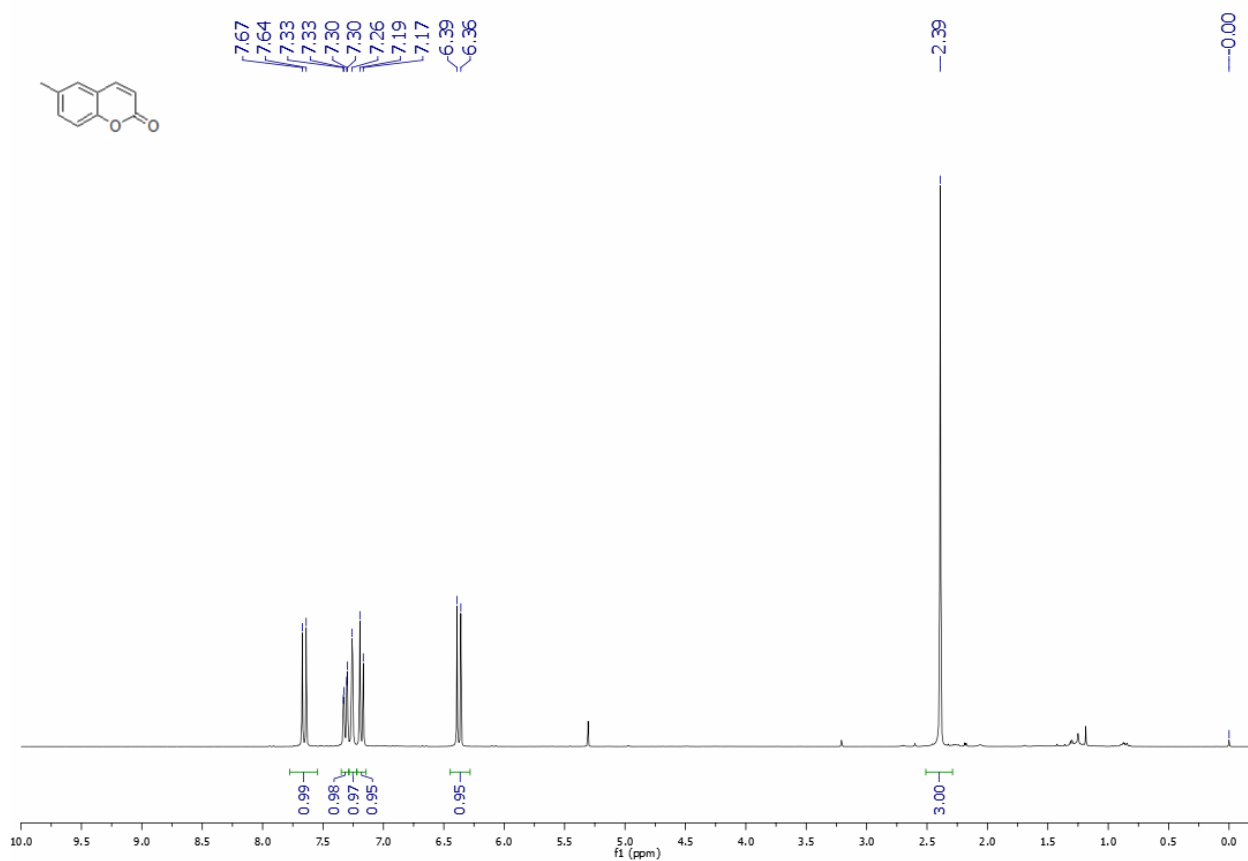

### $^{13}\text{C}$ NMR spectrum of 2h

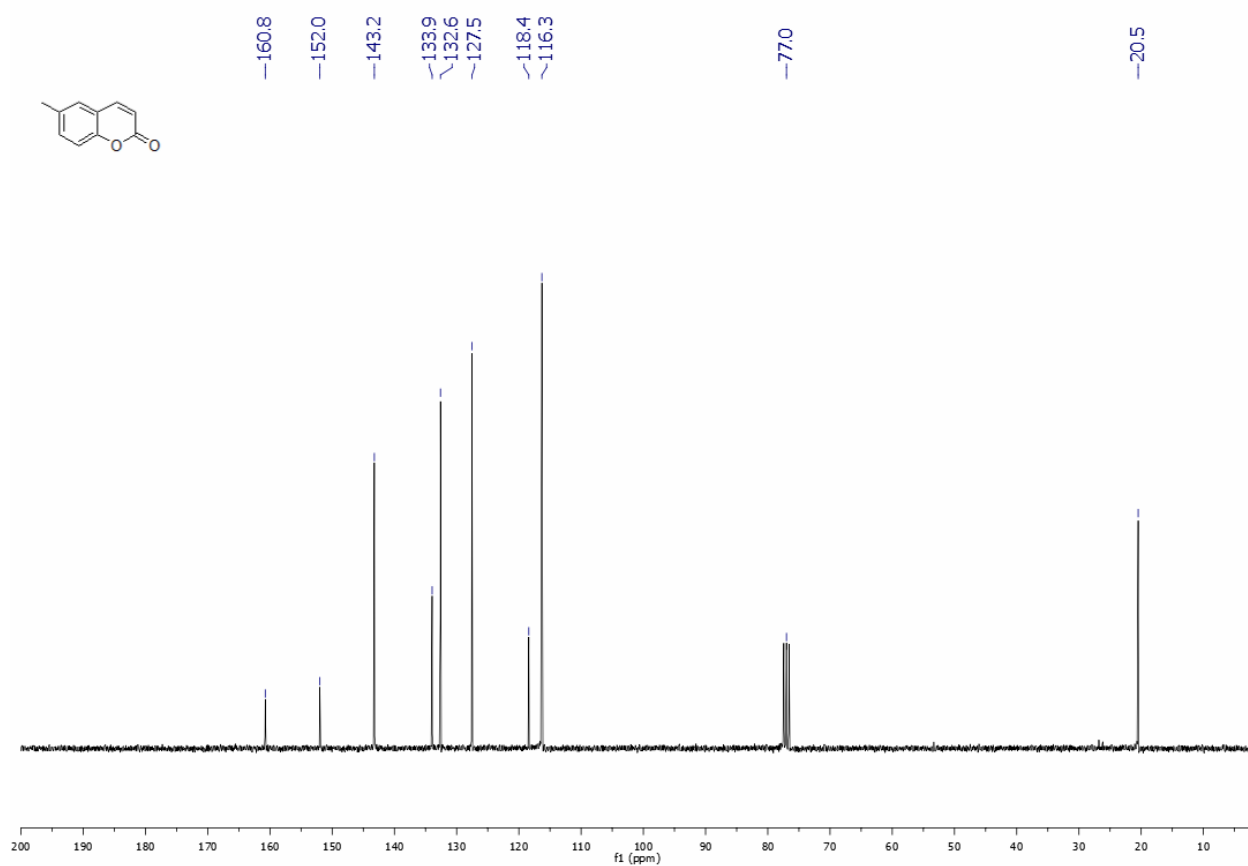

D11 6-Vinyl-2*H*-chromen-2-one (**2i**)

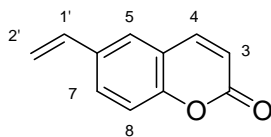

Following the general procedure A, 6-vinyl-2*H*-chromen-2-one (**2i**) was obtained from **4i** (186 mg, 1.0 mmol) as a yellowish solid (with catalyst **A**: 52 mg, 30%, with catalyst **B**: 57 mg, 33%). Mp: 69 – 71°C; <sup>1</sup>H-NMR: δ 7.70 (d, 1H, *J* = 9.5, H-4), 7.60 (dd, 1H, *J* = 8.6, 1.8, H-7), 7.47 (d, 1H, *J* = 1.8, H-5), 7.30 (d, 1H, *J* = 8.6, H-8), 6.63 (dd, 1H, *J* = 17.6, 10.9, H-1'), 6.43 (d, 1H, *J* = 9.7, H-3), 5.76 (d, 1H, *J* = 17.6, H-2'(trans)), 5.32 (d, 1H, *J* = 10.9, H-2' (cis)); <sup>13</sup>C-NMR: δ 160.5 (0), 153.6 (0), 143.3 (1), 135.0 (1), 134.2 (0), 129.4 (1), 125.3 (1), 118.8 (0), 117.0 (1), 117.0 (1), 114.9 (2); IR (neat, cm<sup>-1</sup>):  $\tilde{\nu}$  = 2975 (w), 1723 (s), 1622 (m), 1570 (m), 1489 (w), 1159 (m); HRMS (EI): calcd for C<sub>11</sub>H<sub>8</sub>O<sub>2</sub> [M]<sup>+</sup>: 172.0524, found: 172.0518; MS (EI): *m/z* 172 (M<sup>+</sup>, 100), 144 (77), 129 (23), 115 (73), 83 (25), 57 (63); Anal. calcd for C<sub>11</sub>H<sub>8</sub>O<sub>2</sub>: C: 76.73, H: 4.68; found: C: 75.91, H: 4.49.

### <sup>1</sup>H NMR spectrum of 2i

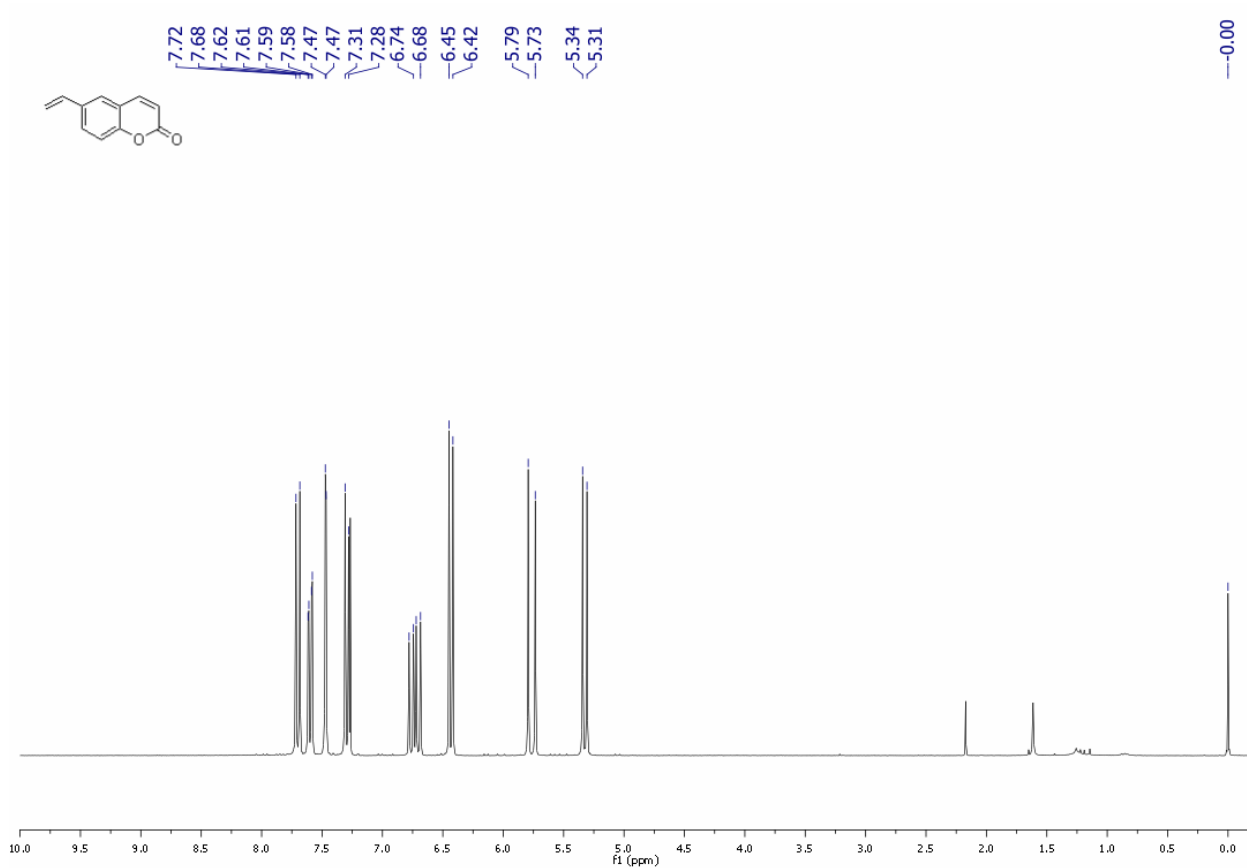

### <sup>13</sup>C NMR spectrum of 2i

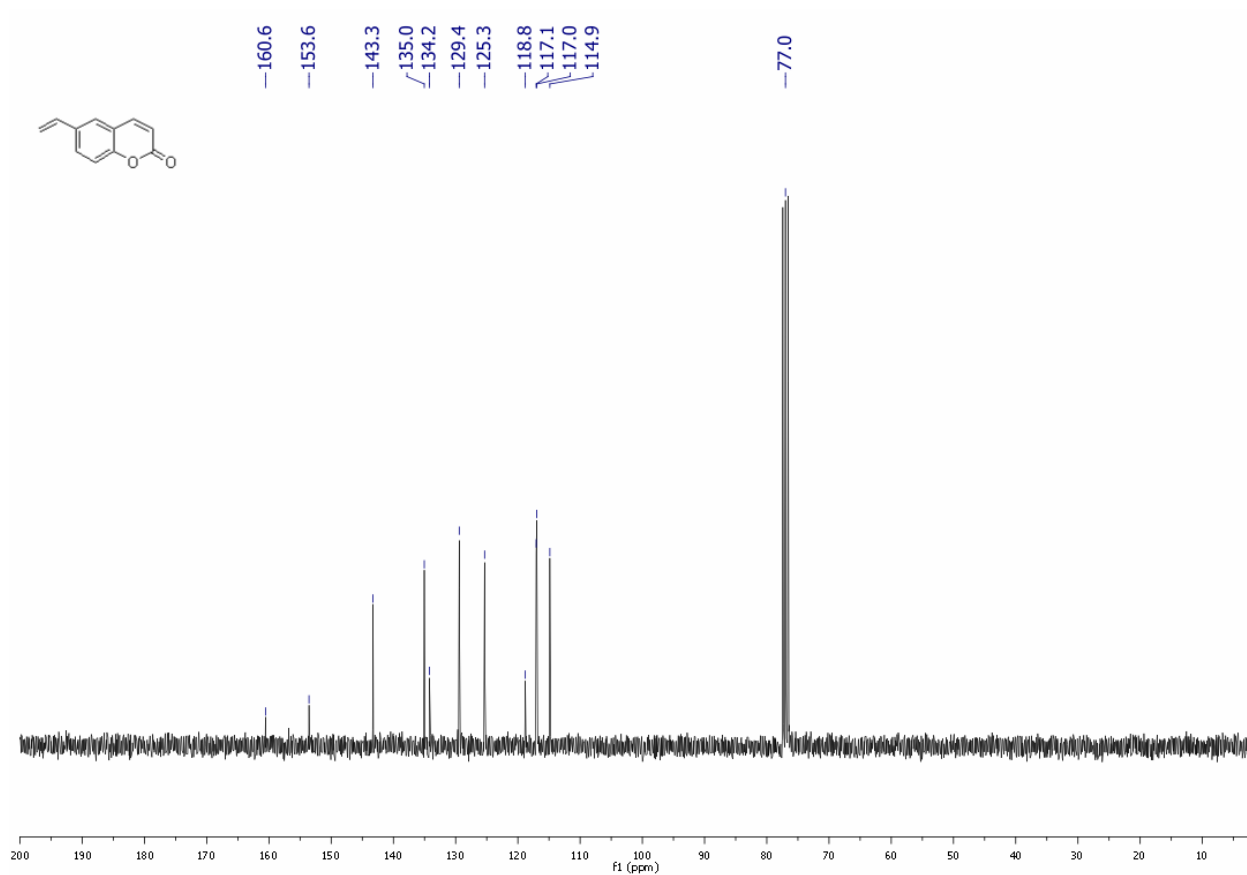

D12 4-Methyl-2*H*-chromen-2-one (**2j**)

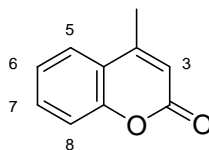

Following the general procedure A, 4-methyl-2*H*-chromen-2-one (**2j**) was obtained from **4j** (174 mg, 1.0 mmol) as a yellowish solid (with catalyst **A**: 48 mg, 30%, with catalyst **B**: 53 mg, 33%). Mp: 69 – 71 °C; <sup>11</sup> <sup>1</sup>H-NMR:  $\delta$  7.61 (d, 1H,  $J = 7.9$ , H-5), 7.53 (m, 1H, H7), 7.35 – 7.26 (2H, H-6, H8), 6.28 (s (br), 1H, H-3), 2.44 (m, 3H,  $CH_3$ ); <sup>13</sup>C-NMR:  $\delta$  160.7 (0), 153.4 (0), 152.3 (0), 131.7 (1), 124.5 (1), 124.1 (1), 119.8 (0), 116.9 (1), 115.0 (1), 18.5 (3); IR (neat,  $cm^{-1}$ ):  $\tilde{\nu} = 3056$  (w), 2981 (w), 1723 (s), 1626 (m), 1609 (m), 1265 (m); HRMS (EI): calcd for  $C_{10}H_8O_2$   $[M]^+$ : 160.0524, found: 160.0510; MS (EI):  $m/z$  160 ( $M^+$ , 73), 132 (69), 131 (100), 121 (23), 103 (20), 77 (27), 43 (27), 39 (29).

<sup>11</sup> Reported in the literature: 75-76 °C; J. Koeber, *Z. Naturforsch. B*, 2005, **60**, 792-796.

### <sup>1</sup>H NMR spectrum of 2j

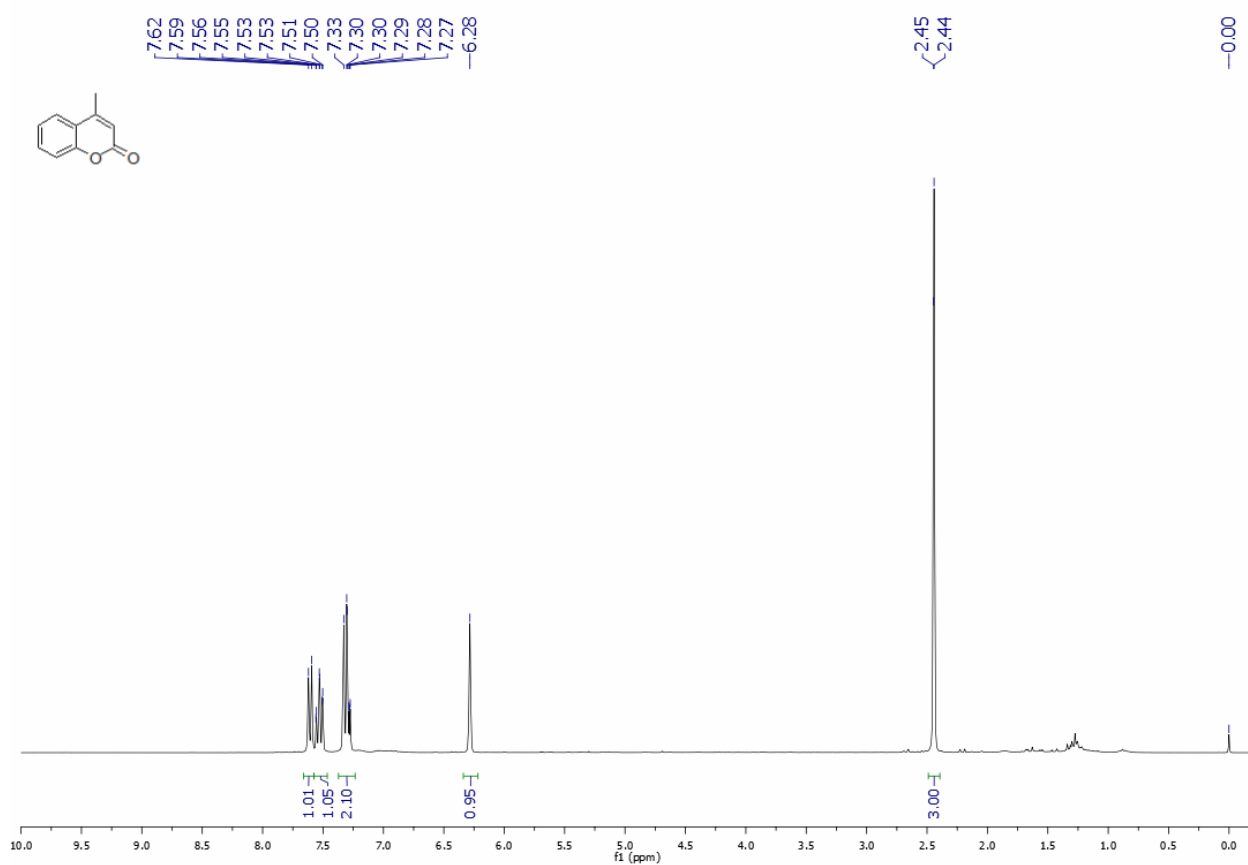

### <sup>13</sup>C NMR spectrum of 2j

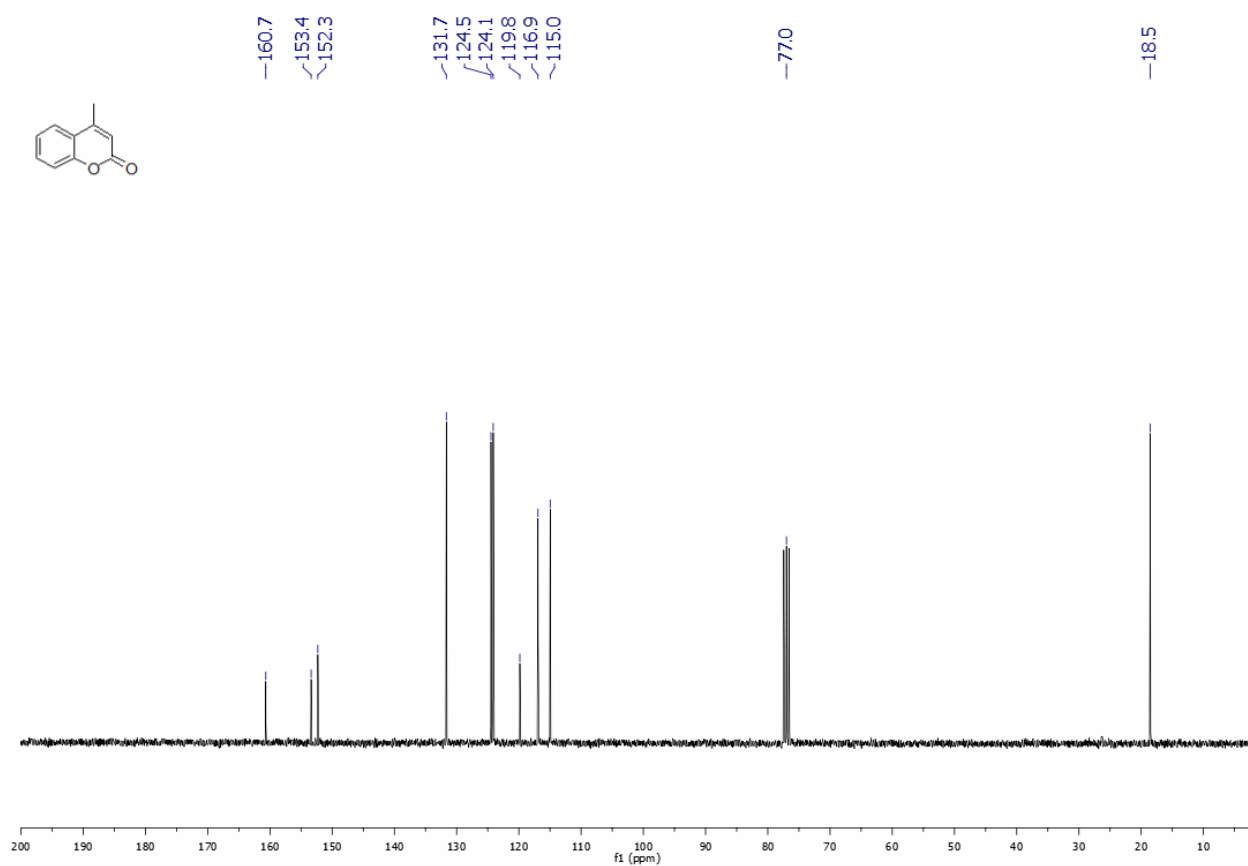

D13 4,6-Dimethyl-2*H*-chromen-2-one (**2k**)

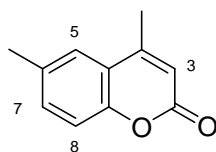

Following the general procedure A, 4,6-dimethyl-2*H*-chromen-2-one (**2k**) was obtained from **4k** (188 mg, 1.0 mmol) as a yellowish solid (with catalyst **A**: 61 mg, 35%, with catalyst **B**: 52 mg, 30%). Mp: 152 – 154°C;<sup>12</sup> <sup>1</sup>H-NMR:  $\delta$  7.38 (s (br), 1H, H-5), 7.33 (dd, 1H,  $J = 8.5$ , 1.8, H-7), 7.22 (d, 1H,  $J = 8.5$ , H-8), 6.27 (m, 1H, H-3), 2.42 (s, 3H, CH<sub>3</sub>), 2.42 (s, 3H, CH<sub>3</sub>); <sup>13</sup>C-NMR:  $\delta$  161.0 (0), 152.3 (0), 151.6 (0), 133.8 (0), 132.6 (1), 124.4 (1), 119.6 (0), 116.7 (1), 115.0 (1), 20.9 (3), 18.6 (3); IR (neat, cm<sup>-1</sup>):  $\tilde{\nu} = 2924$  (w), 1709 (s), 1624 (m), 1610 (m), 1571 (m); HRMS (EI): calcd for C<sub>11</sub>H<sub>10</sub>O<sub>2</sub> [M]<sup>+</sup>: 174.0681, found: 174.0664; MS (EI):  $m/z$  174 (M<sup>+</sup>, 78), 146 (65), 145 (100), 131 (26), 117 (18), 115 (30), 91 (18), 77 (15).

<sup>12</sup> Reported in the literature: 151-153°C; H. Sharghi and M. Jokar, *Heterocycles*, 2007, **71**, 2721-2733.

### $^1\text{H}$ NMR spectrum of 2k

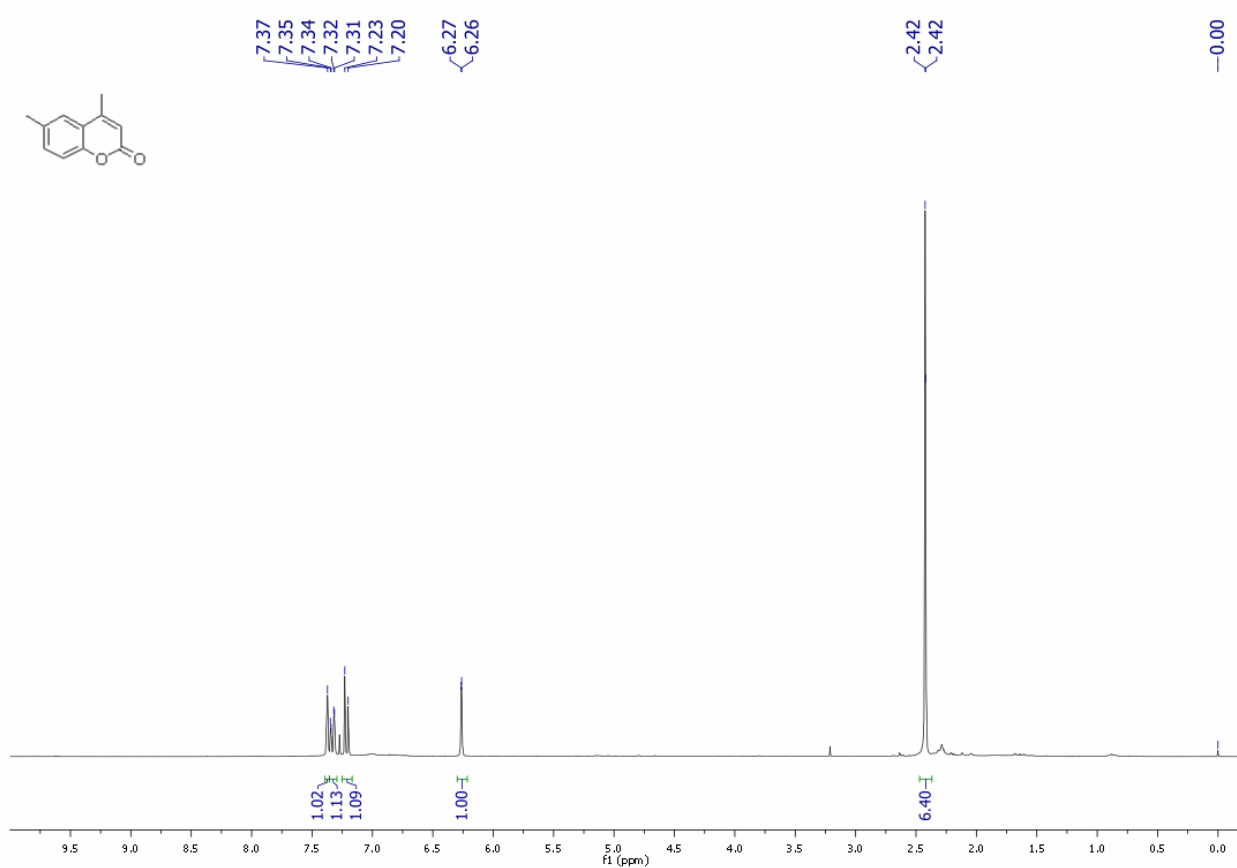

### $^{13}\text{C}$ NMR spectrum of 2k

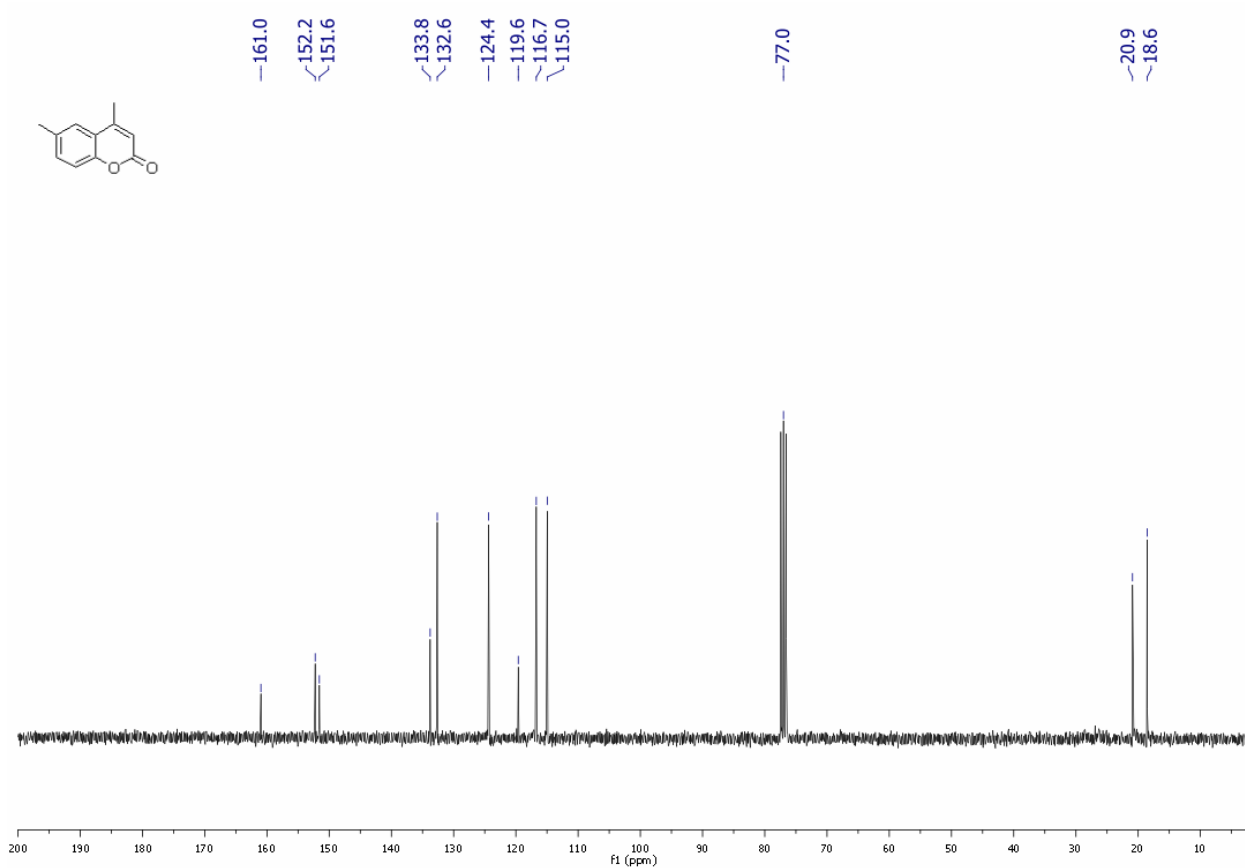



D14 6-Bromo-4-methyl-2*H*-chromen-2-one (**2I**)

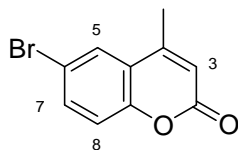

Following the general procedure A, 6-bromo-4-methyl-2*H*-chromen-2-one (**2I**) was obtained from **4I** (253 mg, 1.0 mmol) as a yellowish solid (with catalyst **A**: 120 mg, 50%, with catalyst **B**: 107 mg, 45%). Mp: 187 – 189°C; <sup>13</sup>H-NMR: δ 7.72 (d, 1H, *J* = 2.2, H-5), 7.62 (dd, 1H, *J* = 8.7, 2.3, H-7), 7.22 (d, 1H, *J* = 8.7, H-8), 6.33 (m, 1H, H-3), 2.43 (d, 3H, *J* = 1.3, CH<sub>3</sub>); <sup>13</sup>C-NMR: δ 159.9 (0) 152.4 (0), 151.1 (0), 134.5 (1), 127.2 (1), 121.6 (0), 118.8 (1), 116.9 (0), 116.0 (1), 18.5 (3); IR (neat, cm<sup>-1</sup>):  $\tilde{\nu}$  = 3092 (w), 2928 (w), 1749 (s), 1598 (w), 1556 (w), 1479 (m), 1413 (m), 1380 (m), 1357 (m); HRMS (EI): calcd for C<sub>10</sub>H<sub>7</sub>O<sub>2</sub>[79]Br [M]<sup>+</sup>: 237.9629, found: 237.9626; MS (EI): *m/z* 240 (M<sup>+</sup>, 95), 238 (M<sup>+</sup>, 100), 212 (68), 211 (88), 210 (75), 209 (91), 131 (74), 103 (77), 102 (58), 77 (98), 63 (56), 51 (87), 39 (54); Anal. calcd for C<sub>10</sub>H<sub>7</sub>O<sub>2</sub>Br: C: 50.24, H: 2.95; found: C: 50.21, H: 2.85.

<sup>13</sup> Reported in the literature: mp = 184-186°C; L.-Q. Wu, C.-G. Yang, Y.-F. Wu and L.-M. Yang, *J. Chin. Chem. Soc.*, 2009, **56**, 606-608.

### <sup>1</sup>H NMR spectrum of 2l

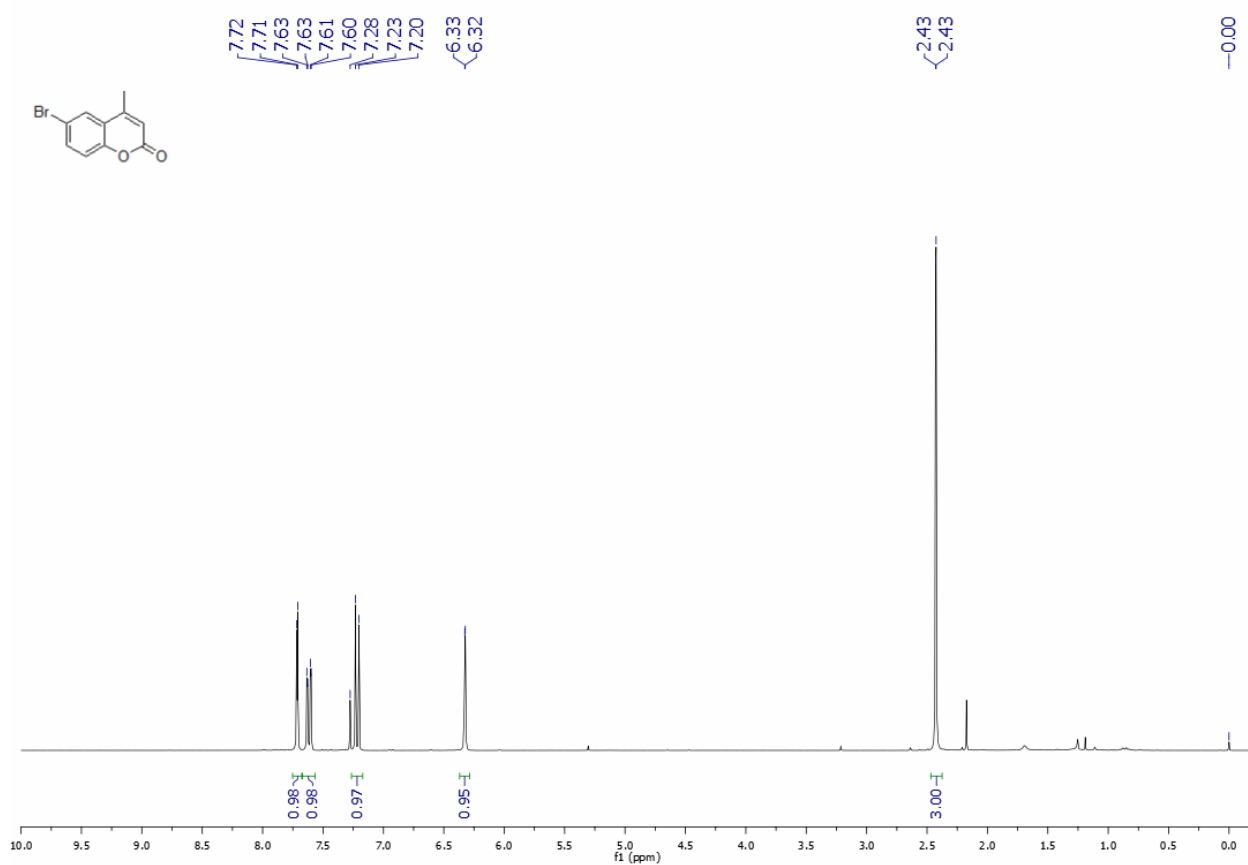

### <sup>13</sup>C NMR spectrum of 2l

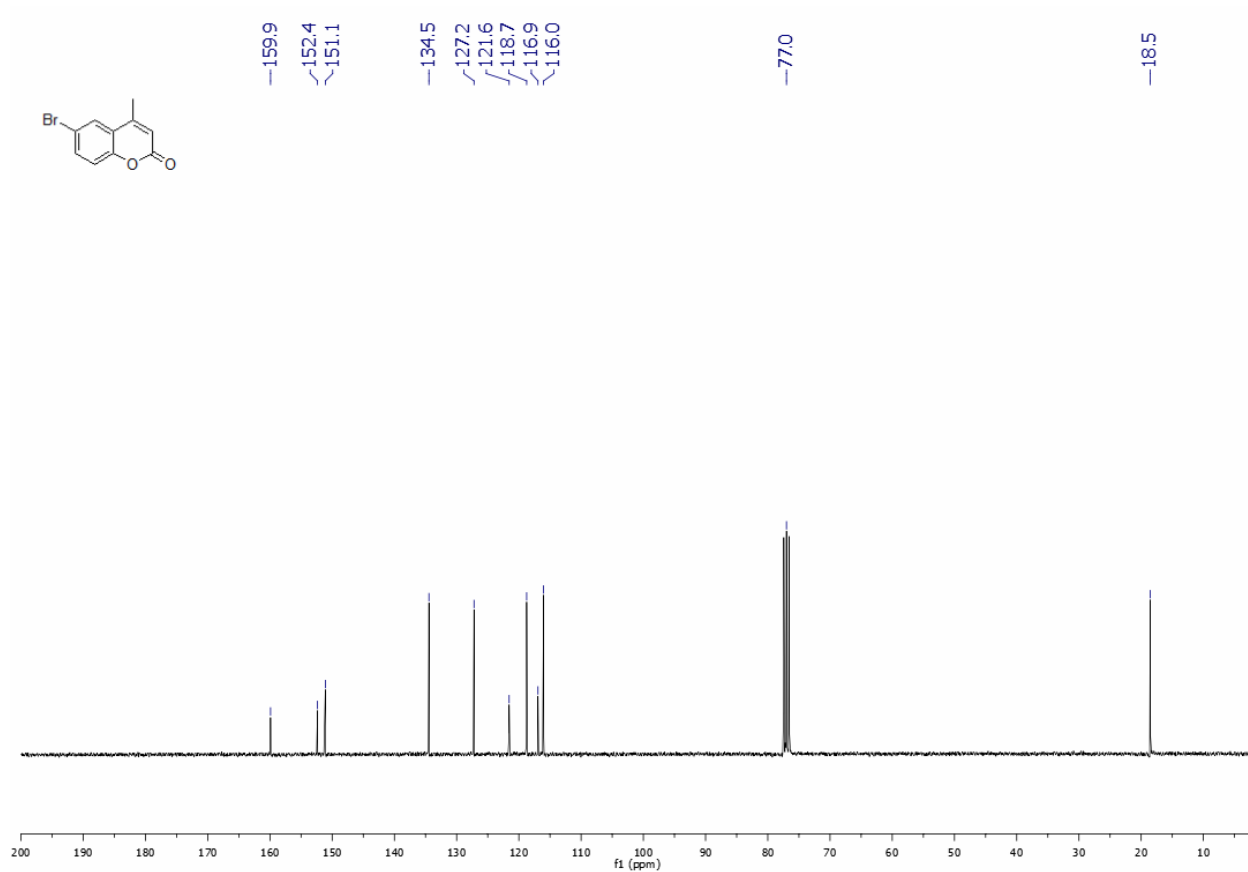

D15 6-Chloro-4-methyl-2H-chromen-2-one (**2m**)

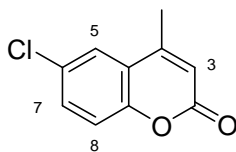

Following the general procedure A, 6-Chloro-4-methyl-2H-chromen-2-one (**2m**) was obtained from **4m** (209 mg, 1.0 mmol) as a yellowish solid (with catalyst **A**: 92 mg, 47%, with catalyst **B**: 86 mg, 44%). Mp: 191 – 193°C;<sup>14</sup> <sup>1</sup>H-NMR:  $\delta$  7.56 (d, 1H,  $J = 2.4$ , H-5), 7.48 (dd, 1H,  $J = 8.7, 2.4$ , H-7), 7.27 (d, 1H,  $J = 8.8$ , H-8), 6.33 (m, 1H, H-3), 2.43 (d, 3H,  $J = 1.3$ ,  $CH_3$ ); <sup>13</sup>C-NMR:  $\delta$  159.9 (0), 151.9 (0), 151.1 (0), 131.6 (1), 129.6 (0), 124.2 (1), 121.1 (0), 118.4 (1), 116.0 (1), 18.5 (3); IR (neat,  $cm^{-1}$ ):  $\bar{\nu} = 2924$  (w), 1720 (s), 1625 (w), 1600 (w), 1484 (w), 1417 (m); HRMS (EI): calcd for  $C_{10}H_7O_2[^{35}Cl] [M]^+$ : 194.0135, found: 194.0122; MS (EI):  $m/z$  196 ( $M^+$ , 21), 194 ( $M^+$ , 65), 168 (25), 167 (40), 166 (73), 165 (100), 155 (15), 131 (26), 103 (25), 77 (28), 57 (27), 51 (27), 43 (27); Anal. calcd for  $C_{10}H_7O_2Cl$ : C: 61.72, H: 3.63; found: C: 61.37, H: 3.40.

<sup>14</sup> Reported in the literature: mp = 184-186°C; P. Goswami, *Synth. Commun.*, 2009, **39**, 2271 - 2278.

### $^1\text{H}$ NMR spectrum of 2m

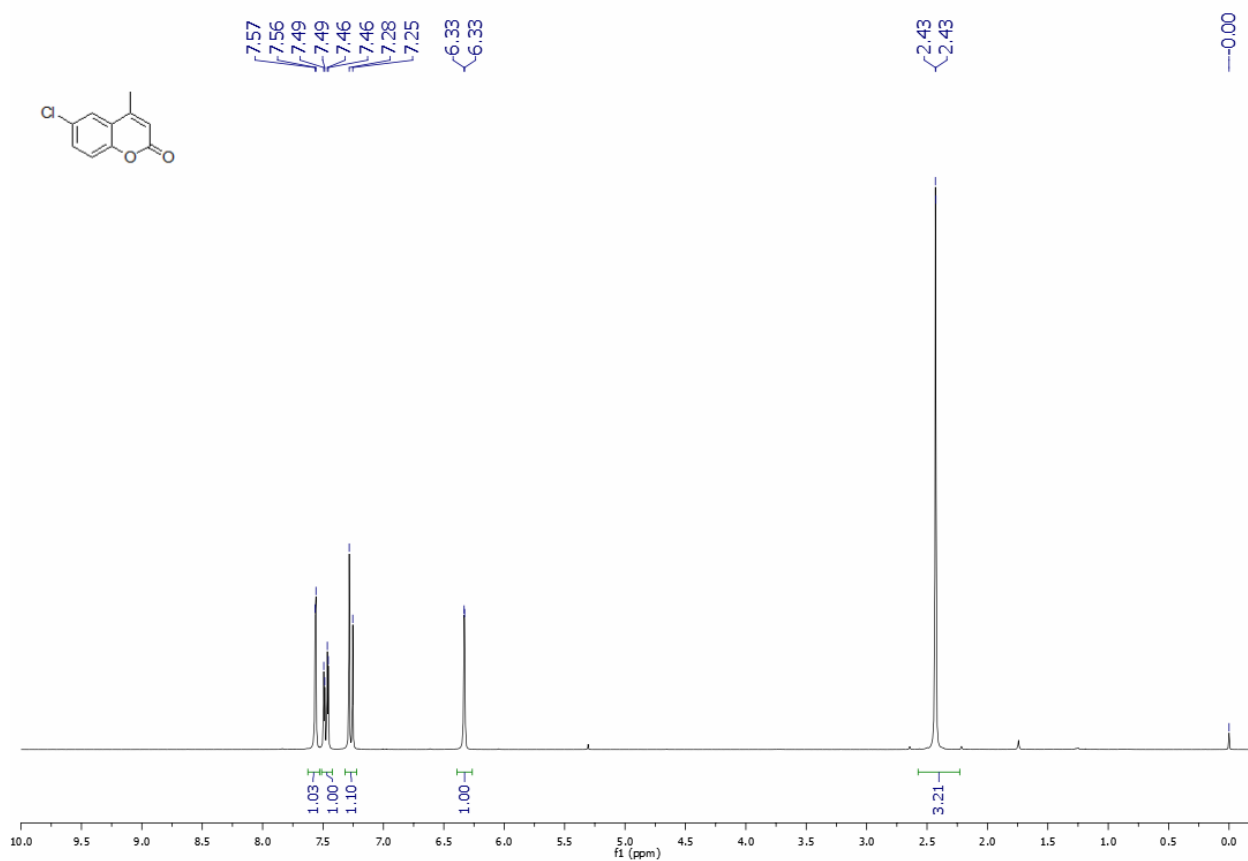

### $^{13}\text{C}$ NMR spectrum of 2m

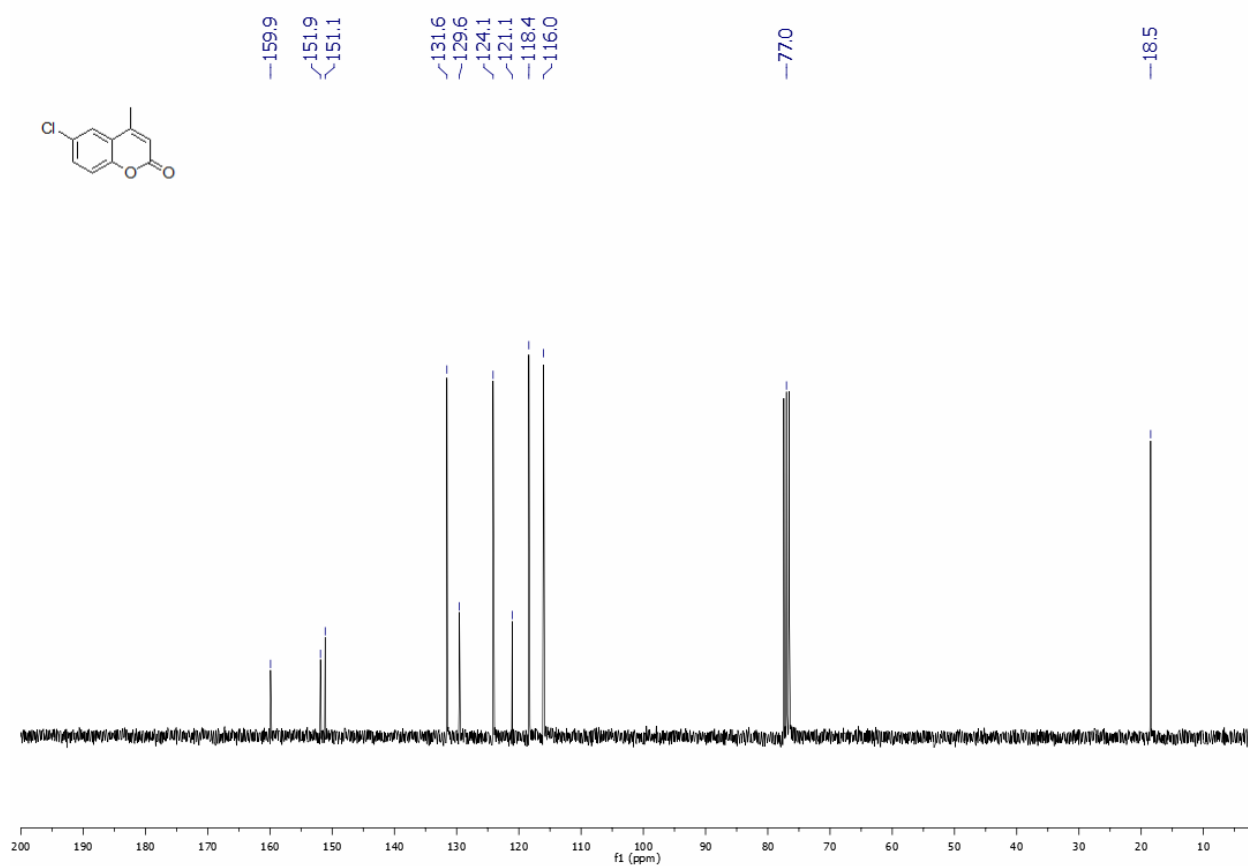

D16 3*H*-Benzo[*f*]chromen-3-one (**2n**)

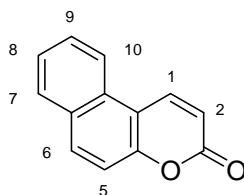

Following the general procedure A, 3*H*-benzo[*f*]chromen-3-one (**2n**) was obtained from **4n** (210 mg, 1.0 mmol) as a yellowish solid (with catalyst **A**: 77 mg, 39%, with catalyst **B**: 77 mg, 39%). Mp: 119 – 121°C;<sup>15</sup> <sup>1</sup>H-NMR:  $\delta$  8.42 (d, 1H,  $J$  = 9.8, H-1), 8.18 (d, 1H,  $J$  = 8.4, H-10), 7.94 (d, 1H,  $J$  = 9.0, H-6), 7.88 (d, 1H,  $J$  = 8.0, H-7), 7.67 (ddd, 1H,  $J$  = 8.4, 7.0, 1.4, H-9), 7.55 (ddd, 1H,  $J$  = 8.1, 7.1, 1.1, H-8), 7.41 (d, 1H,  $J$  = 9.0, H-5), 6.53 (d, 1H,  $J$  = 9.7, H-2); <sup>13</sup>C-NMR:  $\delta$  160.8 (0), 153.8 (0), 139.0 (1), 133.0 (1), 130.2 (0), 128.9 (1), 128.9 (0), 128.2 (1), 126.0 (1), 121.3 (1), 116.9 (1), 115.5 (1), 112.9 (0); IR (neat, cm<sup>-1</sup>):  $\tilde{\nu}$  = 3067 (w), 2928 (w), 1717 (s), 1631 (m), 1563 (s), 1514 (m), 1175 (m); HRMS (EI): calcd for C<sub>13</sub>H<sub>8</sub>O<sub>2</sub> [M]<sup>+</sup>: 196.0524, found: 196.0528; MS (EI):  $m/z$  196 (M<sup>+</sup>, 63), 168 (90), 140 (34), 139 (100), 85 (42), 83 (33).

<sup>15</sup> Reported in the literature: mp = 117-118°C; J. Oyamada and T. Kitamura, *Tetrahedron*, 2006, **62**, 6918-6925.

### <sup>1</sup>H NMR spectrum of 2n

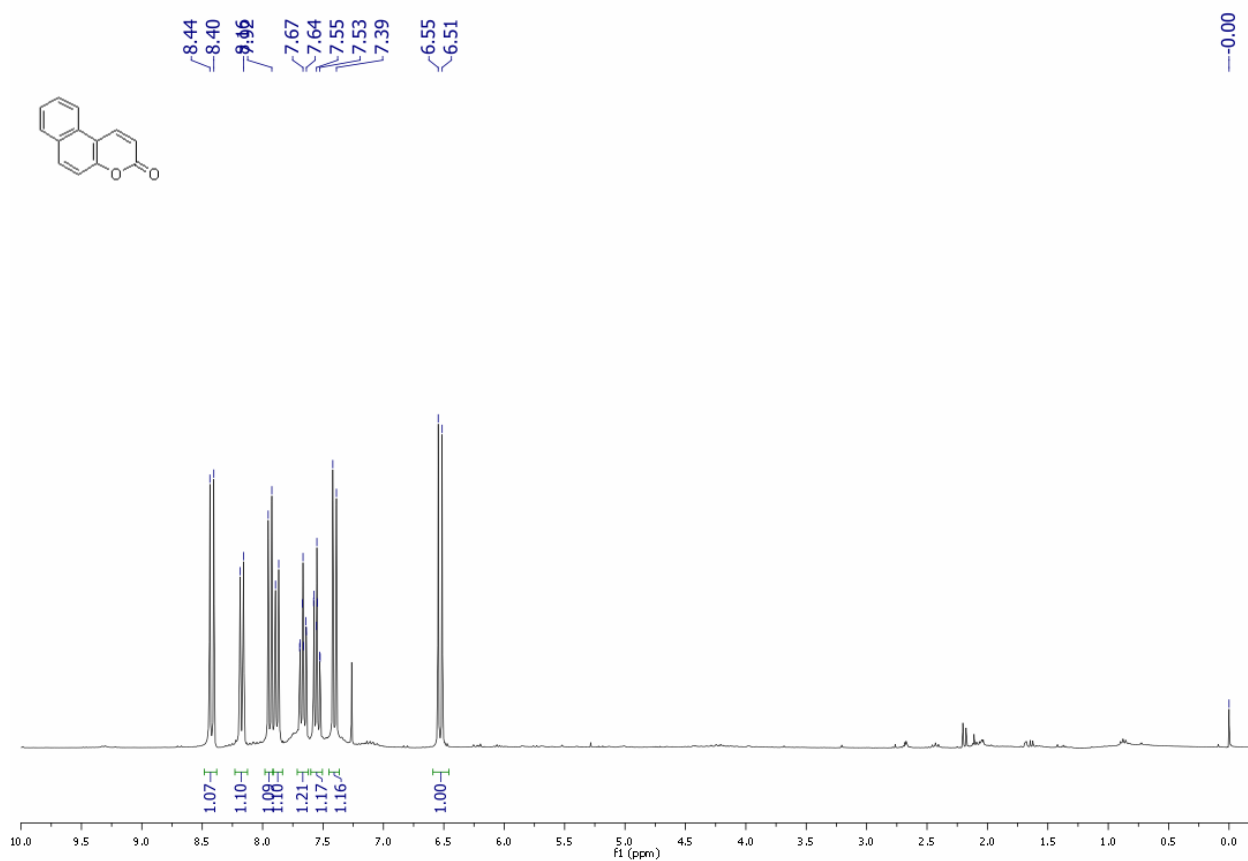

### <sup>13</sup>C NMR spectrum of 2n

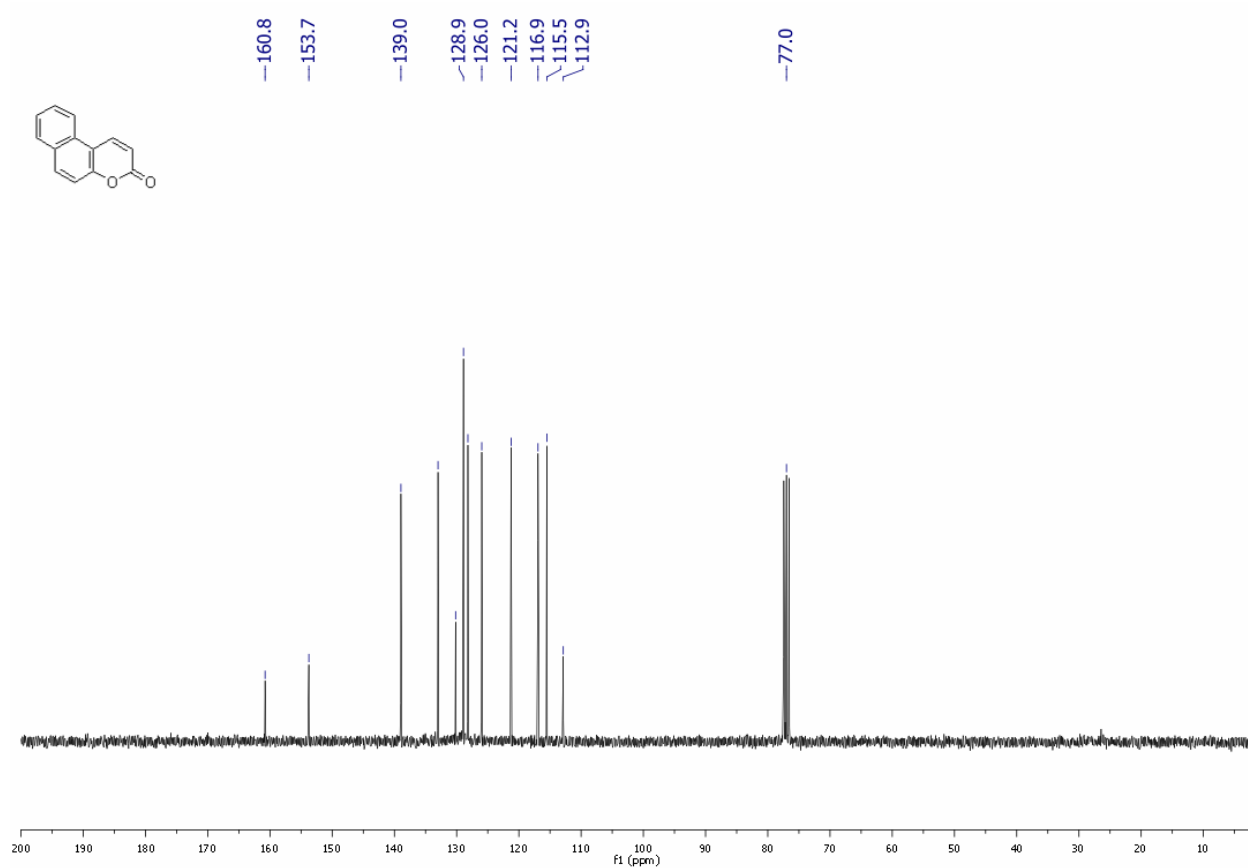

D17 Control experiment: allylic oxidation in the absence of Ru-catalyst

Purified (via kugelrohr distillation) chromene **5a** (132 mg, 1.0 mmol) was dissolved in ethyl acetate (10 mL) and immersed in an oil bath preheated to 40 °C. To this solution was added <sup>t</sup>BuOOH (5.5 M in decane, 720 μL, 4.0 mmol) via syringe pump within 15 min. The reaction mixture was stirred for 72 h at 40 °C. Then all volatiles were removed in vacuo. After column chromatography on silica unreacted chromene **5a** (41 mg, 31%), coumarin **2a** (20 mg, 14%) and 2-(*tert*-butylperoxy)-2*H*-chromene (**7a**, 79 mg, 36%) were isolated.

Analytical data for 2-(*tert*-butylperoxy)-2*H*-chromene (**7a**):

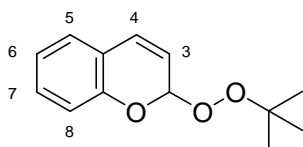

Colourless oil. <sup>1</sup>H-NMR: δ 7.23 (m, 1H, H-7), 7.13 (dd, 1H, *J* = 7.5, 1.6, H-5), 7.03 (d, 1H, *J* = 8.1, H-8), 6.95 (td, 1H, *J* = 7.5, 1.1, H-6), 6.80 (d, 1H, *J* = 9.6, H-4), 6.15 (d, 1H, *J* = 4.0, H-2), 5.75 (dd, 1H, *J* = 9.6, 4.0, H-3), 1.22 (s, 9H, C(CH<sub>3</sub>)<sub>3</sub>); <sup>13</sup>C-NMR: δ 151.6 (0), 129.7 (1), 129.2 (1), 127.1 (1), 121.5 (1), 120.3 (0), 117.0 (1), 115.3 (1), 97.3 (1), 81.2 (0), 26.5 (3, 3C); IR (neat, cm<sup>-1</sup>):  $\tilde{\nu}$  = 2977 (w), 1640 (m), 1608 (m), 1488 (m), 1458 (m), 1363 (m), 1313 (m); HRMS (ESI): calcd for C<sub>13</sub>H<sub>16</sub>O<sub>3</sub>Na [M+Na]<sup>+</sup>: 243.0997, found: 243.0992; MS (EI): *m/z* 220 (M<sup>+</sup>, 8), 147 (13), 131 (100), 121 (13), 77 (17), 73 (94), 57 (82), 55 (16), 43 (39), 41 (22); Anal. calcd for C<sub>13</sub>H<sub>16</sub>O<sub>3</sub>: C: 70.89, H: 7.32; found: C: 70.26, H: 7.30.

### <sup>1</sup>H NMR spectrum of 7a

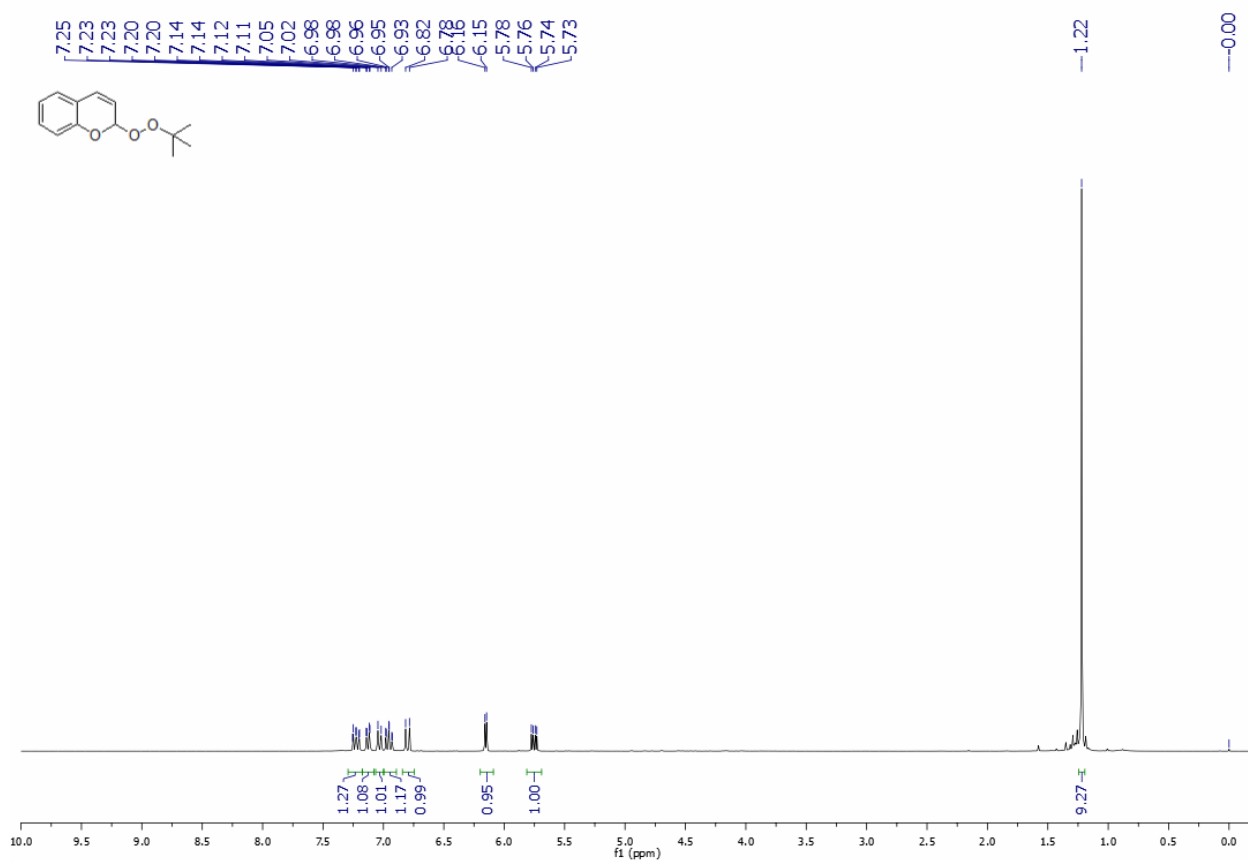

### <sup>13</sup>C NMR spectrum of 7a

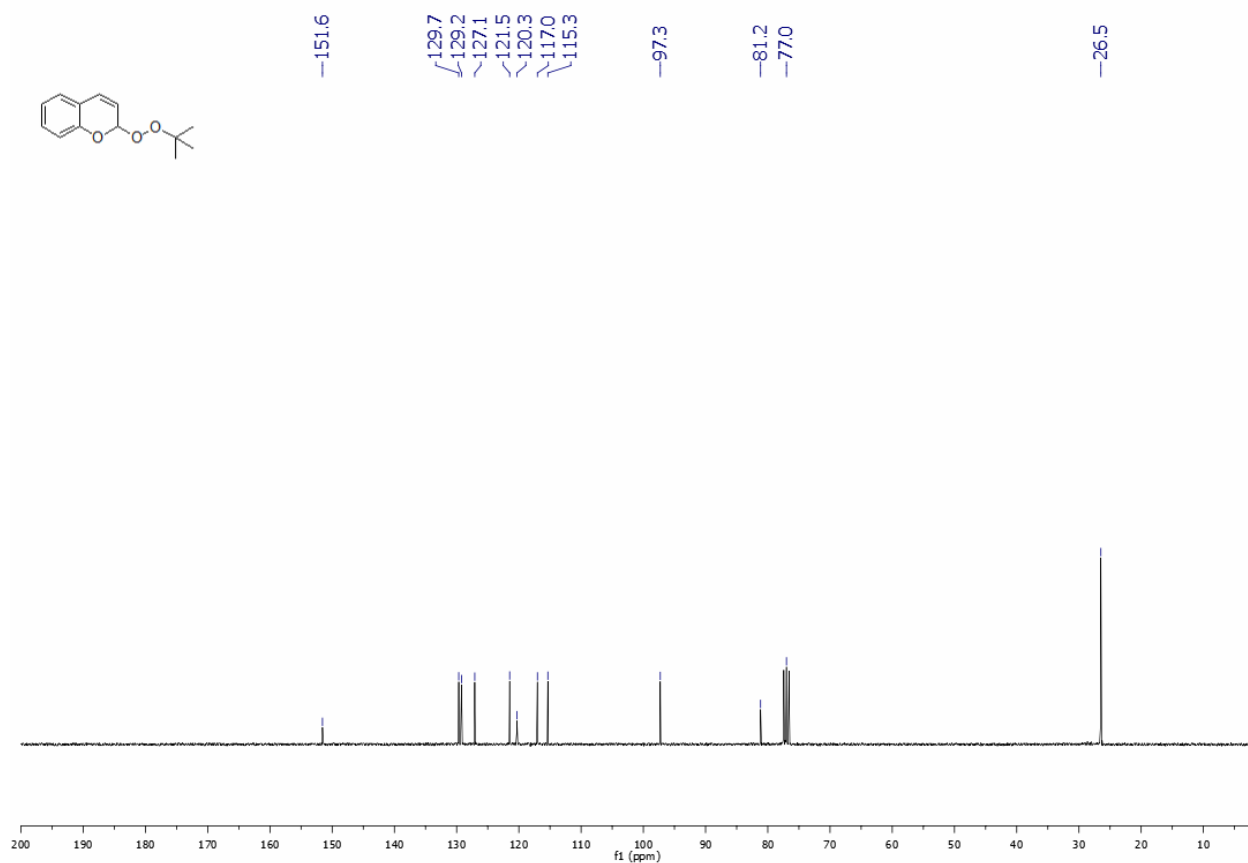



D18 Control experiment 2: allylic oxidation of **5a** catalyzed by Ru-catalyst **A**

Purified (via Kugelrohr distillation) chromene **5a** (132 mg, 1.0 mmol) was dissolved in dry and degassed benzene (1.0 mL). Catalyst **A** (40 mg, 0.05 mmol) was then added. Immediately after addition of the catalyst, the reaction vessel was immersed in an oil bath preheated to 40 °C (electronic temperature control) and the solution was stirred for 5 min. Then <sup>t</sup>BuOOH (5.5 M in decane, 720 μL, 4.0 mmol) was added to the reaction mixture via syringe pump within 15 min. After complete addition of the oxidant, the mixture was stirred for another 3 h. It was diluted with MTBE (50 mL), and MgSO<sub>4</sub> was added to absorb water and Ru residues. The mixture was filtered and all volatiles were removed in vacuo. The residue was purified by column chromatography on silica. Coumarin **2a** was obtained as a yellowish solid (70 mg, 48%). Analytical data were identical with those reported in section D1.
